# Supplementary material for: The landscape of N 6-methyladenosine modification patterns and altered transcript profiles in the cardiac-specific deletion of natriuretic peptide receptor A
Source: Royal Society of Chemistry journal article supplement (doi:10.1039/d2mo00201a), 2022-10-31
Supplement: d2mo00201a5.pdf [file d2mo00201a5.pdf]

**Supplementary Table 1: Primers of RT-qPCR.**

| Targeting genes | Sequences of primers                                             | Annealing temperature (°C) | Product length (bp) |
|-----------------|------------------------------------------------------------------|----------------------------|---------------------|
| GAPDH(MOUSE)    | F:5' CACTGAGCAAGAGAGGCCCTAT3'<br>R:5' GCAGCGAACTTTATTGATGGTATT3' | 60                         | 144                 |
| Crk             | F:5' TCTCCGTGAAGCCTACGAACT3'<br>R:5' TCTTGAGGTCCAATAACTGCTACAC3' | 60                         | 103                 |
| Acvr2a          | F:5' TATCTCTTGCTCTTCAGGTGCTA3'<br>R:5' TCGCCGTTTATCTTTATCACCC3'  | 60                         | 136                 |
| Ank3            | F:5' AAGCAGGGAGAAGGCTATAAGGT3'<br>R:5' CCACACTCCACTCTTGGTACTAT3' | 60                         | 171                 |
| Bmp4            | F:5' CCGAGCCAACACTGTGAGGAG3'<br>R:5' TTTATACGGTGAAGCCCTGT3'      | 60                         | 107                 |
| Lats1           | F:5' AAGAGTGC GGACAGTGGTGAC3'<br>R:5' CTTGAGATAATCCAACCCGCAT3'   | 60                         | 224                 |
| Tiam1           | F:5' GGCTGTCAATCTACGAGGAGTG3'<br>R:5' GCATACCGCATTTCCTCT3'       | 60                         | 113                 |
| Anp32b          | F:5' GAACTTCCAAGCCTCACACATCT3'<br>R:5' GCCTGAAGACAGTTTCTCGGTAA3' | 60                         | 157                 |
| Tbc1d15         | F:5' GCTATGAAGCGGAGTGGGA3'<br>R:5' CCAGGCTGAACAGGAACGA3'         | 60                         | 120                 |
| Ncoa1           | F:5' CAGGTGGAAACGCAAACATT3'<br>R:5' CCTGTGTCTCAGTGCTGGAT3'       | 60                         | 130                 |
| Hinfp           | F:5' AGTGTGGCTGAAAGGCTGTA3'<br>R:5' GAACACTGGAATCGCTGCTGA3'      | 60                         | 187                 |
| Gabbr1          | F:5' TGGTTTTCATCGGGTGGTAT3'<br>R:5' CAGCCGCTTGTTAGTTTCTC3'       | 60                         | 195                 |
| Jade1           | F:5' GCCTGAGGAAGTGGTGGATT3'<br>R:5' CCAAGAGCTTAGTGTACTGAGTGAA3'  | 60                         | 278                 |
| Sgo2a           | F:5' CCAAGCCTTAGAAGCAAGATGA3'<br>R:5' TTGAGAACTCGGGAAAACCCAG3'   | 60                         | 76                  |
| Pdk4            | F:5' TCAGGTTATGGGACAGACGCTAT3'<br>R:5' CTTCTCCTTCGCCAGTTCTT3'    | 60                         | 168                 |
| Cenpf           | F:5' CCAGTGGGATTTGGGAGCAT3'<br>R:5' CTTGTCTTCCAGTTGGGATGTC3'     | 60                         | 190                 |
| Bmp4 (mazF)     | F:5' CGGTGGGAACTTTCGATGTG3'<br>R:5' CTTCTGCGGGTCAAGGTATGG3'      | 60                         | 233                 |
| Cenpf (mazF)    | F:5' ACTAGAGAAGGGGGAGAAAGAGAT3'<br>R:5' TCTGCTCCAGTGCCATAGTCA 3' | 60                         | 155                 |
| Lats1 (mazF)    | F:5' GCTTACCCAAGGAAGATGATAGTG 3'<br>R:5' TCTTTATCCCCAGAGTACCAC3' | 60                         | 61                  |

|             |                                                               |    |     |
|-------------|---------------------------------------------------------------|----|-----|
| Pdk4 (mazF) | F:5' CAAACCTTGACCTGATGAGGG3'<br>R:5' CGGGTCATCCAACCAAGCTC3'   | 60 | 44  |
| ALKBH5      | F:5' CGGTCATCATTCTCAGGAAGACA3'<br>R:5' GAGCTAAAACCTCCCCTCCG3' | 60 | 259 |
| FTO         | F:5' CTTACCAGGGGAGACTGCTAT 3'<br>R:5' AGTGGAATAAACCGAGGCT 3'  | 60 | 96  |
| HNRNPA2B1   | F:5' AGACTGTGTGGTTATGCGGG3'<br>R:5' TTCACAGTCACATGGGCTCC3'    | 60 | 192 |
| HNRNPC      | F:5' CAGAACACCTTCTCCGTCC 3'<br>R:5' ACCACAGCTCGAGCAATAGG 3'   | 60 | 136 |
| IGF2BP2     | F:5' TTCGACTGGACTGTCTGTGC3'<br>R:5' TCGAGCGAGCTGTTTGTATGT3'   | 60 | 244 |
| IGF2BP3     | F:5' GGATCGGTGTCCAAGCAGAA3'<br>R:5' TGTTGCGAATGGTAGCACCT3'    | 60 | 106 |
| METTL3      | F:5' GGTTCGTTCACCAGTCATA3'<br>R:5' CTAGTAGGTGTATCCCATCCAG3'   | 60 | 155 |
| METTL14     | F:5' TCGCAAAGTGGGGTTACAGAA3'<br>R:5' ATGAAGTCCCCGTCTGTGCT3'   | 60 | 172 |
| METTL16     | F:5' GACAAACCACCTGACTTCGCA3'<br>R:5' TCTGACTGCTTCGGGGTCTT3'   | 60 | 117 |
| RBM15       | F:5' CCAAGGCACTGGCCAAATCT3'<br>R:5' TCATCCGCTGTTACCAGTTT3'    | 60 | 77  |
| RBM15B      | F:5' GACTATTACGGGCTGTACGACG3'<br>R:5' CAGGTTGCCGATGAAGAGGT3'  | 60 | 120 |
| RBMX        | F:5' AAGCTGCAAACCGATGCTTG3'<br>R:5' TGCTGTTTACGGGCATTTG3'     | 60 | 206 |
| VIRMA       | F:5' CAGGTTTTTACACCGCCTG 3'<br>R:5' TAGGGCGGTAACCCGTAGAA 3'   | 60 | 185 |
| WTAP        | F:5' AAAGGTCCGACTGAGTGAAAC 3'<br>R:5' CACTCTTGATCTCCTGCTCT 3' | 60 | 243 |
| YTHDC1      | F:5' GATGATTTCTTCGCGCAC3'<br>R:5' CGATCACGACCTCTGTCTCG3'      | 60 | 134 |
| YTHDC2      | F:5' CTGAACCGCTCCAGCTTTA3'<br>R:5' AAAGGGTACGGTAAGCGAG3'      | 60 | 217 |
| YTHDF1      | F:5' ATGCCAACCTACTTCTGCC3'<br>R:5' GAACCCCGCCACTCTTAA3'       | 60 | 119 |
| YTHDF2      | F:5' CAGCTCTCAGTCCAGCAACA3'<br>R:5' AGTAGATCCAGAACCCGCCT3'    | 60 | 132 |

|        |                                                            |    |     |
|--------|------------------------------------------------------------|----|-----|
| YTHDF3 | F:5' GGGTCAGTGGTAAAGGCTCC3'<br>R:5' TGCAACTGTGGCTGTTGAGA3' | 60 | 206 |
|--------|------------------------------------------------------------|----|-----|
