# Supplementary material for: The landscape of N 6-methyladenosine modification patterns and altered transcript profiles in the cardiac-specific deletion of natriuretic peptide receptor A
Source: Royal Society of Chemistry journal article supplement (doi:10.1039/d2mo00201a), 2022-10-31
Supplement: d2mo00201a6.pdf [file d2mo00201a6.pdf]

Supplementary Table 11: The top 10 methylation stoichiometry hypermethylated single nucleotide m6A site between NPRA<sup>-/-</sup> vs NPRA<sup>+/+</sup>.

| Trans ID         | Fold change | Pvalue      | Gene Symbol | m6A motif Sequence | Transcript Sequence                                                                              |
|------------------|-------------|-------------|-------------|--------------------|--------------------------------------------------------------------------------------------------|
| NM_008415        | 1.976358609 | 0.043929247 | Jrk         | GGACA              | 1..1801<br>cagcaGGGTTGAAGAGCGGGTTGTGGCAGGGAGGGACATAGATGAGGCCCTG<br>CCATTGTGGCACcatcc 1872..5529  |
| NM_001040<br>072 | 1.905117392 | 0.036360233 | Nynrin      | GGACA              | 1..3531<br>gaagaCAGCGAGGGTCCTCAGTCAGGGGGGGACAGCCCCTATGCTGTGGCTTGG<br>GCCCTCAAGCAttttg 3602..7413 |
| NM_001159<br>492 | 1.814244634 | 0.020877608 | Gpatch8     | GAACA              | 1..1248<br>acctaATTTCCCCTTCTTACTCTTTATGAGAGCCAGTGAACAGATGGAAGGGGAT<br>CATAGTGCACactca 1319..6829 |
| NM_001081<br>212 | 1.7908534   | 0.013139404 | Irs2        | GGACA              | 1..6156<br>aacctGCGCTGCATTTGCTGTGTAGCTGAATCCCCAGGGACAGTAGGACTGATC<br>TGCTGACTACagcac 6227..6794  |
| NM_001310<br>430 | 1.715442216 | 0.044810846 | Gpr161      | GAACA              | 1..1848<br>agctaCCGGGACTGGTGCCTGTGCCAAGACCCTGGAACATGTCACCACTCAGAG<br>AGGGCCAGACgccggg 1919..6862 |
| NM_001324<br>488 | 1.667108006 | 0.049073758 | Gpatch21    | AGACA              | 1..103<br>gagctAGTGCATGACCTGGCCTCAGCCTTGGAGCAGACATCGGAGCAGAGCAAG<br>CTTGGTGAGCTgtggg 174..4261   |
| NM_001081<br>006 | 1.659126424 | 0.025367318 | Etl4        | GGACA              | 1..4580<br>agaaaCCAGTTATTATCATTTTTGATGAACCCATGGACATCCGATCTGCATATAA<br>AAGACTCTCAaccat 4651..7413 |
| NM_080855        | 1.651935987 | 0.043909566 | Zcche14     | GAACA              | 1..3910<br>tccagCAGTAATGCAGACCTGTGATTCATGAACAAAAGACTGGAAACTGTGGC<br>TTCTTTTGTATtaggc 3981..6476  |

|                  |             |             |         |       |                                                                                                          |
|------------------|-------------|-------------|---------|-------|----------------------------------------------------------------------------------------------------------|
| NM_001145<br>162 | 1.649313099 | 0.035884858 | Ube2q11 | GGACA | 1..2154<br>cagggGATGCTGCGGCCACCAGGGGGGGTTCA <u>GG</u> ACATGAGGTGCCCTCCCTG<br>GGTGCTCAGATcagca 2225..2682 |
| NM_001358<br>803 | 1.61956154  | 0.01379973  | Sppl2b  | GGACA | 1..2678<br>tggtcCTCCTAGAGCTCTGGGGATGGGGGCAGGG <u>G</u> ACATCCCCTAGGCACCTG<br>TCTAACCAGAAtggat 2749..2927 |
