# Supplementary material for: The landscape of N 6-methyladenosine modification patterns and altered transcript profiles in the cardiac-specific deletion of natriuretic peptide receptor A
Source: Royal Society of Chemistry journal article supplement (doi:10.1039/d2mo00201a), 2022-10-31
Supplement: d2mo00201a7.pdf [file d2mo00201a7.pdf]

Supplementary Table 12: The top 10 methylation stoichiometry hypomethylated single nucleotide m6A site between NPRA<sup>-/-</sup> vs NPRA<sup>+/+</sup>.

| Trans ID         | Fold change | P value     | Gene Symbol | m6A_motif_Sequence | transcript_Sequence                                                                               |
|------------------|-------------|-------------|-------------|--------------------|---------------------------------------------------------------------------------------------------|
| NM_026235        | 0.666473758 | 0.047656779 | Larp6       | GGACA              | 1..1803<br>catgtGTTAGTGTGGTGGCTCTGAAGGGCTGTGGGACAGAGGATCTCTGGAA<br>AGATCTAGTAGTGtcgga 1874..2308  |
| NM_011263        | 0.664513767 | 0.003321852 | Rest        | AAACA              | 1..1833<br>aaacaATCCAGAAAAGCCCTGTAAAGCCAAGAAAACAAAAGAAAGAAGG<br>ATGCTGAGGCCATCccctcc 1904..4266   |
| NM_029934        | 0.664310511 | 0.003352324 | Mboat7      | AGACA              | 1..1367<br>ggctgCTGAGGGCTATTTGGAGTCAGCCTTGCGGAGACCTGAGCCCCGGG<br>GGCCAGAAAGCCTgggac 1438..2341    |
| NM_001355<br>742 | 0.663995368 | 0.008674844 | Foxn2       | AAACA              | 1..1563<br>actctGAAAGGGCAGCCAGGCAAAAAGATCCCAAAACAGTCCTGTCAAGAG<br>ATTGATGAGGAGCTcaaag 1634..5341  |
| NM_009086        | 0.663187093 | 0.025405808 | Polr1b      | GGACA              | 1..2789<br>aggacATGCCTTTCCTGAGAGTGGCATGATGCCGGACATTCTGTTTAATCC<br>TCACGGGTTTCCCtcccg 2860..3998   |
| NM_001080<br>819 | 0.661354466 | 0.03195893  | Arid1a      | GGACA              | 1..6737<br>ctcagAGTTCCTCTGTATGAGTCACGGCTGTTGGACATCTCCGTGTCACCAC<br>TGATGAACTCATtggtt 6808..8175   |
| NM_138679        | 0.657698501 | 0.007223761 | Ash11       | GGACA              | 1..8595<br>gtctgAACGCTCAAAGCCACCCCTAAAAGACCTAGGACAAGAAGATGATGCT<br>TTGCCCTTGATTGaagag 8666..11270 |
| NR_028056        | 0.657272239 | 0.023427046 | Rit1        | GAACA              | 1..740<br>tactgGCCATGGAGAAGAAGGCCAAACCCAAAGAACAGCGTATGGAAGAGGC<br>TGAAGTCACCGTTCaggag 811..2538   |

|                  |             |             |        |       |                                                                                                          |
|------------------|-------------|-------------|--------|-------|----------------------------------------------------------------------------------------------------------|
| NM_001358<br>674 | 0.656999492 | 0.046739066 | Zfp740 | GGACA | 1..1624<br>ctctgTAACCAGTCTGAGGCTATGAGTATCCCAGG <u>G</u> ACCTGCAGCATTCTT<br>GGCAAGGGAGCtggtc 1695..4382   |
| NM_001252<br>580 | 0.656513545 | 0.033955817 | Usp8   | AAACA | 1..1628<br>ctcgtATTCATCAAGAACTGCCCTTCTTATGGAAAAGAATAA <u>A</u> CAGGAGAA<br>GGAAC TTGGGACaagca 1699..4210 |
