# Supplementary material for: The landscape of N 6-methyladenosine modification patterns and altered transcript profiles in the cardiac-specific deletion of natriuretic peptide receptor A
Source: Royal Society of Chemistry journal article supplement (doi:10.1039/d2mo00201a), 2022-10-31
Supplement: d2mo00201a8.pdf [file d2mo00201a8.pdf]

Supplementary Table 8: The 9 methylation stoichiometry hypomethylated m6A cluster between NPRA<sup>-/-</sup> vs NPRA<sup>+/+</sup>.

| Trans ID     | Fold change | P value     | Peak Sequence                                                                                                                                                                                                                                                                                                                                                                                                                                      | Gene Symbol | m6A motif Sequence                                  |
|--------------|-------------|-------------|----------------------------------------------------------------------------------------------------------------------------------------------------------------------------------------------------------------------------------------------------------------------------------------------------------------------------------------------------------------------------------------------------------------------------------------------------|-------------|-----------------------------------------------------|
| NM_001167885 | 0.650388735 | 0.025836871 | 1..3101<br>caagcgggatgaggagagcagggggccatgtgcagaggcctgcacgagaACGGGGTGTGCTGCAGCGACCC<br>CCTCTCCCTGCTCGAGTCCCAGATGGAGGTGGACGACTACAGTCAATATGAGGAG<br>GACAGCACAGATGAATCCTCATCTTCTGAGGGGGAGGAGGAGGAGGAGGACTGC<br>GAGGATGACTTCGATGATGACTTCATTCCTTCTCCTCCGGCAAAGCGGCTGAGGCT<br>AATTGTTGGTAAAGACTCCATAGATATTGACATTTCTTCAAGGAGAAGAGAAGAT<br>CAGTCTCTAAGACTGAACGCATGAGCGCTCACTCATTGTTCTGGAGAActaaaaagtaaaa<br>atcccgccacagctcttggcacagcacttctgtggt 3492..6131 | Kmt5b       | TGACA                                               |
| NM_001294279 | 0.404397682 | 0.001820777 | 1..4251<br>g'gcctcccagcatcccctcaccacaactccttgcctatcttggACTAAGAGAAAGAGCAGGGACTGTC<br>TGAGGACAGCCCGCTTCTGTACCAAACCAAGAGACAGAGACAGGAACAGACA<br>AAAACCACAAAACCTTAAACACAACCCACAGCAGGTGTATGTTGCTGCAAAACCT<br>TCAGACCCAGGGTCTGGAccatgtgtactgtatatcttagtaaggaatagagaattggctctgtatg<br>4506..7609                                                                                                                                                           | Zfp827      | GGACA                                               |
| NM_001355499 | 0.370126275 | 0.004301819 | 1..1171<br>gattcctcgatccttatacaccacaacggaggcatcccagccaacaaaACTGTCCACAACGTTGCCAGAGAT<br>AGAATATCGAGAAAAAGGGAAAGAGAAGGACAAGGATGCCAAGAAACACAACCT<br>TGGAATAAAATAACAACATTCTACAACCTGTAGACTCTAAGATACAAGAGATT<br>GAGTATATGGAACCATATCAATAGTAAAAGATTAAACAATGATCTTGTGGAA<br>GTACAGAAAATCTCTTAAAGAGGActcatgctgcttctcaaaaaattacaaaaatgccagtggagttgtga<br>1485..4092                                                                                            | Maco1       | GGACA;AA<br>ACA;TAAC<br>A;GGACA;<br>AAACA;TA<br>ACA |
| NM_001357952 | 0.519187126 | 0.01448799  | 1..2865<br>gcagcaagatggggacaacggagacagcagcaaaagcactgagacaagtACTTTGAAAATATTGAATCCCCCT                                                                                                                                                                                                                                                                                                                                                               | Usp47       | GGACA                                               |

|              |             |             |                                                                                                                                                                                                                                                                                                                                                                                                              |        |       |
|--------------|-------------|-------------|--------------------------------------------------------------------------------------------------------------------------------------------------------------------------------------------------------------------------------------------------------------------------------------------------------------------------------------------------------------------------------------------------------------|--------|-------|
|              |             |             | CTCAATGAGAGGGGCTCTCCACCTCTGTGGATAATCGAGAACTTGAACAGCACA<br>TTCAGACTTCTGACCCAGAAAACCTTCAGTCTGAGGAACGCTCGGACTCAGATGTG<br>AATAATGACCGGAGTACAAGTTCGGTAGACAGTGATATTCTTAGCTCCAGTCACA<br>GCAGTGACACTTTGTGCAATGCAGACAGCGCTCAGATTCTCTGGCCAATGGACTT<br>GACTCTCACAGTATCACAAAGTAGTAGAAGAACTAAAGCAAACGAGGGGAAAAAG<br>GAGACCTGGACACAGCTGAAGAAGACTCTGGActgacagtgaatatgacgagagtggcaagagca<br>ggggggacatgcagtac 3299..5600     |        |       |
| NM_001360886 | 0.498890549 | 0.015777075 | 1..2279<br>cagcatcagcgaattcatacgggagagaagccttataagtgcagtgaatgtACAATGCTTTACCGGGAGCGTG<br>CACCTGACTGAACA TCGGAGTACTCACACTGGAGAGAAACC TTACA ACTCTGAGT<br>GCCACAGACTTTCAGCCAGAGCACATACTCAGCATCAGAAGATTCATTCA<br>GGAGAGAAGCTTTTGGGGTGTGAGGActgtgaaaaagcctccagtgtcactctgctctcaccacaccagag<br>at 2542..2847                                                                                                         | Zfp184 | TGACA |
| NM_007396    | 0.581639801 | 0.003036387 | 1..2126<br>cattactacagggacattgtaacagtggtcacaatgggacaaatgtACTTTCCTCCCAAAGAATCTAGTCTA<br>TGATGGTGGCACCGTCTGTACACACTGAGGACTGGGACTCTGAACTGGAGCTGCT<br>AAGCTAAGGAAAGTGCTTAGTTGATTTTCTGTGTGAAATGAGTAGGATGCCTCCAG<br>GACTGTACGCAAGCAGCCCCTTGTGGAAAGCATGGATCTGGGAGATGGATCTGG<br>GAACTTACTGCATCGTCTGCAGCACAGATATGAAGAGGAGTCTAAGGGAAAAGC<br>TGCAAACTGTAAAGAActctgaaaatgtactgaagaatgtggccctctcaaatcaaggatctt 2490..5681 | Acvr2a | GGACA |
| NM_013720    | 0.472459284 | 0.003682577 | 1..6591<br>tctaactcacaggcagagccaagaagattgtgaagattctctggggaaggACTCTTAGAGAGAGATGGAG<br>AAAACA CTTAAAGGGCCCTTAACTCAGAAGTACATTGGAATTTACAGAACTT<br>AACAAAGAGGCAAACGTTTCAGTTCTTTACAGAAATGAAGCCATGTCAAGAAAATT<br>CTGAACAGGATATCTCTGAATTACTTGAAAAAGTGGAAActattgagagtggagggttctaaaaa<br>ctgaggatggttctggagtggc 6865..13931                                                                                            | Mga    | GGACA |

|           |             |             |                                                                                                                                                                                                                                                                                                                                                                                       |       |                 |
|-----------|-------------|-------------|---------------------------------------------------------------------------------------------------------------------------------------------------------------------------------------------------------------------------------------------------------------------------------------------------------------------------------------------------------------------------------------|-------|-----------------|
| NM_019825 | 0.612947074 | 0.015636855 | 1..5565<br>tctgccaatcgtcgaagcccagtcctccagtaagggcaaaggaaaagtggACA <del>AA</del> ATTGGCCAGATTTTGCTG<br>ACCAAGGCTTGTAAAGAAAGTTACAGGCTCTCTGGAGAAAGGGGAAGAACAATATG<br>GTGCAGATGGAGAGACTGAAGGCCAGGGCTAGAGATCACAACCTCTGGGCTAAT<br>GGGAACAGAGCAGTGCTCCACAGAGCTGGA <del>ca</del> gtaaaacccaacacccctcagcaccactctactaaaa<br>atgaccteta 5831..6872                                                | Ncoa6 | GGACA;GA<br>ACA |
| NR_156445 | 0.535503518 | 0.008561465 | 1..530<br>aacatcaagaaccaaccaccaactgaagaaagaggcagtcgttttgaaagACATTA <del>ACTCTGA</del> ACACAGACTT<br>TGTTTCATTAAGACAAGTTCCTATAAATATGATTTATATGAAA <del>AACTTTGA</del> AGT<br>ACAATTCAGACTTACTTAGCAGTAGAACTGTGTAAGAAAGAAAGGAGACGGGTG<br>TGGTGGATTTGGGGA <del>ACC</del> ACTTCTGTACCTGAAGCAAGAGAA <del>ACC</del> CCACGCTGGA<br>ctggaatactcagaatataatggaaacggaagggtctcagccataagga 822..1981 | Zfp1  | AGACA;GA<br>ACA |
