# Supplementary material for: The landscape of N 6-methyladenosine modification patterns and altered transcript profiles in the cardiac-specific deletion of natriuretic peptide receptor A
Source: Royal Society of Chemistry journal article supplement (doi:10.1039/d2mo00201a), 2022-10-31
Supplement: d2mo00201a9.pdf [file d2mo00201a9.pdf]

Supplementary Table 13: The distribution of gene feature.

| Gene Feature | Group                                                  | Diffmethylated | Amount |
|--------------|--------------------------------------------------------|----------------|--------|
| CDS          | Abundance cluster 1                                    | hyper1         | 0      |
|              | Abundance multi nucleotide m6A site 1                  | hyper2         | 34     |
|              | Abundance single nucleotide m6A site 1                 | hyper3         | 68     |
|              | Methylation stoichiometry cluster 1                    | hyper4         | 0      |
|              | Methylation stoichiometry multi nucleotide m6A site 1  | hyper5         | 3      |
|              | Methylation stoichiometry single nucleotide m6A site 1 | hyper6         | 11     |
|              | Abundance cluster 1                                    | hypo1          | 0      |
|              | Abundance multi nucleotide m6A site 1                  | hypo2          | 86     |
|              | Abundance single nucleotide m6A site 1                 | hypo3          | 288    |
|              | Methylation stoichiometry cluster 1                    | hypo4          | 6      |
|              | Methylation stoichiometry multi nucleotide m6A site 1  | hypo5          | 76     |
|              | Methylation stoichiometry multi nucleotide m6A site 1  | hypo6          | 237    |
| 3'UTR        | Abundance cluster 2                                    | hyper7         | 3      |
|              | Abundance multi nucleotide m6A site 2                  | hyper8         | 31     |
|              | Abundance single nucleotide m6A site 2                 | hyper9         | 85     |
|              | Methylation stoichiometry cluster 2                    | hyper10        | 0      |
|              | Methylation stoichiometry multi nucleotide m6A site 2  | hyper11        | 4      |
|              | Methylation stoichiometry single nucleotide m6A site 2 | hyper12        | 7      |
|              | Abundance cluster 2                                    | hypo7          | 3      |
|              | Abundance multi nucleotide m6A site 2                  | hypo8          | 31     |
|              | Abundance single nucleotide m6A site 2                 | hypo9          | 105    |
|              | Methylation stoichiometry cluster 2                    | hypo10         | 2      |
|              | Methylation stoichiometry multi nucleotide m6A site 2  | hypo11         | 32     |

|       |                                                        |         |    |
|-------|--------------------------------------------------------|---------|----|
|       | Methylation stoichiometry single nucleotide m6A site 2 | hypo12  | 90 |
| 5'UTR | Abundance cluster 3                                    | hyper13 | 0  |
|       | Abundance multi nucleotide m6A site 3                  | hyper14 | 0  |
|       | Abundance single nucleotide m6A site 3                 | hyper15 | 1  |
|       | Methylation stoichiometry cluster 3                    | hyper16 | 0  |
|       | Methylation stoichiometry multi nucleotide m6A site 3  | hyper17 | 0  |
|       | Methylation stoichiometry single nucleotide m6A site 3 | hyper18 | 0  |
|       | Abundance cluster 3                                    | hypo13  | 0  |
|       | Abundance multi nucleotide m6A site 3                  | hypo14  | 4  |
|       | Abundance single nucleotide m6A site 3                 | hypo15  | 16 |
|       | Methylation stoichiometry cluster 3                    | hypo16  | 0  |
|       | Methylation stoichiometry multi nucleotide m6A site 3  | hypo17  | 3  |
|       | Methylation stoichiometry single nucleotide m6A site 3 | hypo18  | 8  |
