# Supplementary material for: The landscape of N 6-methyladenosine modification patterns and altered transcript profiles in the cardiac-specific deletion of natriuretic peptide receptor A
Source: Royal Society of Chemistry journal article supplement (doi:10.1039/d2mo00201a), 2022-10-31
Supplement: d2mo00201a10.pdf [file d2mo00201a10.pdf]

Supplementary Table 14: Conjoint Analysis of m6A Single Nucleotide resolution microarray analysis & One-Color Microarray-Based Gene Expression Analysis.

| Abundance_cluster<br>(hypo-up) | # FC(expression) >= 1.5 & FC(methylation) <= 0.66667 |             |            |                   |             |                              |             |            |              |             |
|--------------------------------|------------------------------------------------------|-------------|------------|-------------------|-------------|------------------------------|-------------|------------|--------------|-------------|
|                                | Probe Name                                           | Fold Change | Regulation | Ref Seq Accession | Gene Symbol | Cluster id                   | Foldchange  | Regulation | Trans ID     | Gene Symbol |
|                                | A_52_P664656                                         | 1.5823147   | up         | NM_007396         | Acvr2a      | NM_007396-1                  | 0.620338065 | hypo       | NM_007396    | Acvr2a      |
|                                | A_52_P486464                                         | 2.2603662   | up         | NM_001294279      | Zfp827      | NM_001294279-7               | 0.402086081 | hypo       | NM_001294279 | Zfp827      |
| Abundance_multi<br>(hyper-up)  | # fc(expression) >= 1.5 & fc(methylation) >= 1.5     |             |            |                   |             |                              |             |            |              |             |
|                                | Probe Name                                           | Fold Change | Regulation | Ref Seq Accession | Gene Symbol | Probe Name                   | Foldchange  | Regulation | Trans ID     | Gene Symbol |
|                                | A_55_P1977071                                        | 1.6611844   | up         | NM_028666         | Fam110a     | ASMM10m6ADR<br>ACA1000966094 | 1.56692938  | hyper      | NM_028666    | Fam110a     |
|                                | A_55_P2334684                                        | 1.5627696   | up         | NM_001081267      | Rsf1        | ASMM10m6ADR<br>ACA1004158464 | 1.949281992 | hyper      | NM_001081267 | Rsf1        |
|                                | A_52_P573290                                         | 1.8335214   | up         | NM_029870         | Crebrf      | ASMM10m6ADR<br>ACA1002656234 | 1.714911415 | hyper      | NM_029870    | Crebrf      |
| Abundance_multi<br>(hypo-up)   | # FC(expression) >= 1.5 & FC(methylation) <= 0.66667 |             |            |                   |             |                              |             |            |              |             |
|                                | Probe Name                                           | Fold Change | Regulation | Ref Seq Accession | Gene Symbol | Probe Name                   | Foldchange  | Regulation | Trans ID     | Gene Symbol |
|                                | A_52_P104761                                         | 1.7758885   | up         | NM_011276         | Rlim        | ASMM10m6ADR<br>ACA1002362214 | 0.397117984 | hypo       | NM_011276    | Rlim        |
|                                | A_55_P2019004                                        | 2.6507288   | up         | NM_172495         | Ncoa7       | ASMM10m6ADR<br>ACA1001195744 | 0.643894888 | hypo       | NM_172495    | Ncoa7       |
|                                | A_55_P2062513                                        | 1.5534679   | up         | NM_018884         | Pdzrn3      | ASMM10m6ADR<br>ACA1001287024 | 0.574648804 | hypo       | NM_018884    | Pdzrn3      |
|                                | A_55_P2062513                                        | 1.5534679   | up         | NM_018884         | Pdzrn3      | ASMM10m6ADR<br>ACA1003198904 | 0.615648232 | hypo       | NM_018884    | Pdzrn3      |

|                                |                                                                           |                    |                   |                          |                    |                              |                   |                   |                 |                    |
|--------------------------------|---------------------------------------------------------------------------|--------------------|-------------------|--------------------------|--------------------|------------------------------|-------------------|-------------------|-----------------|--------------------|
|                                | A_55_P2062911                                                             | 1.836381           | up                | NM_007937                | Epha5              | ASMM10m6ADR<br>ACA1002058474 | 0.557372616       | hypo              | NM_007937       | Epha5              |
|                                | A_55_P1975405                                                             | 4.5682481          | up                | NM_178363                | Ylpm1              | ASMM10m6ADR<br>ACA1001751554 | 0.475847722       | hypo              | NM_178363       | Ylpm1              |
|                                | A_55_P1975405                                                             | 4.5682481          | up                | NM_178363                | Ylpm1              | ASMM10m6ADR<br>ACA1003360114 | 0.465374574       | hypo              | NM_178363       | Ylpm1              |
|                                | <b># FC(expression) &lt;= 0.66667 &amp; FC(methylation) &lt;= 0.66667</b> |                    |                   |                          |                    |                              |                   |                   |                 |                    |
|                                | <b>Probe Name</b>                                                         | <b>Fold Change</b> | <b>Regulation</b> | <b>Ref Seq Accession</b> | <b>Gene Symbol</b> | <b>Probe Name</b>            | <b>Foldchange</b> | <b>Regulation</b> | <b>Trans ID</b> | <b>Gene Symbol</b> |
|                                | A_55_P2100425                                                             | 0.504050017        | down              | NM_007937                | Epha5              | ASMM10m6ADR<br>ACA1002058474 | 0.557372616       | hypo              | NM_007937       | Epha5              |
|                                | A_55_P2413598                                                             | 0.644287927        | down              | NM_001080813             | Rab11fip<br>1      | ASMM10m6ADR<br>ACA1004076504 | 0.497152236       | hypo              | NM_001080813    | Rab11fip1          |
|                                | A_55_P2413598                                                             | 0.644287927        | down              | NM_001080813             | Rab11fip<br>1      | ASMM10m6ADR<br>ACA1001938094 | 0.581603532       | hypo              | NM_001080813    | Rab11fip1          |
|                                | A_55_P2031736                                                             | 0.577447255        | down              | NM_013780                | Npas3              | ASMM10m6ADR<br>ACA1000012544 | 0.580411645       | hypo              | NM_013780       | Npas3              |
|                                | A_66_P132855                                                              | 0.650355364        | down              | NM_011714                | Baz1b              | ASMM10m6ADR<br>ACA1003831014 | 0.58730604        | hypo              | NM_011714       | Baz1b              |
|                                | A_66_P132855                                                              | 0.650355364        | down              | NM_011714                | Baz1b              | ASMM10m6ADR<br>ACA1004332864 | 0.577248087       | hypo              | NM_011714       | Baz1b              |
|                                | A_55_P2173011                                                             | 0.610705409        | down              | NM_182716                | Nfasc              | ASMM10m6ADR<br>ACA1002162104 | 0.481832829       | hypo              | NM_182716       | Nfasc              |
|                                | A_55_P2159234                                                             | 0.632922128        | down              | NM_001347356             | Tatdn2             | ASMM10m6ADR<br>ACA1001939044 | 0.625761418       | hypo              | NM_001347356    | Tatdn2             |
| Abundance_multi<br>(hypo-down) |                                                                           |                    |                   |                          |                    |                              |                   |                   |                 |                    |
| Abundance_single               | <b># FC(expression) &gt;= 1.5 &amp; FC(methylation) &gt;= 1.5</b>         |                    |                   |                          |                    |                              |                   |                   |                 |                    |

|                                  |                                                                       |                    |                   |                          |                    |                              |                   |                   |                 |                    |
|----------------------------------|-----------------------------------------------------------------------|--------------------|-------------------|--------------------------|--------------------|------------------------------|-------------------|-------------------|-----------------|--------------------|
| (hyper-up)                       | <b>Probe Name</b>                                                     | <b>Fold Change</b> | <b>Regulation</b> | <b>Ref Seq Accession</b> | <b>Gene Symbol</b> | <b>Probe Name</b>            | <b>Foldchange</b> | <b>Regulation</b> | <b>Trans ID</b> | <b>Gene Symbol</b> |
|                                  | A_51_P379409                                                          | 2.1384088          | up                | NM_198013                | Cuedc1             | ASMM10m6ADR<br>ACA1002032154 | 1.64268746        | hyper             | NM_198013       | Cuedc1             |
|                                  | A_55_P2289800                                                         | 1.7065968          | up                | NM_028194                | Fryl               | ASMM10m6ADR<br>ACA1000035844 | 1.876501746       | hyper             | NM_028194       | Fryl               |
|                                  | A_55_P2024468                                                         | 4.1441162          | up                | NM_198100                | Tbkbp1             | ASMM10m6ADR<br>ACA1003631394 | 1.516953566       | hyper             | NM_198100       | Tbkbp1             |
|                                  | A_52_P505143                                                          | 1.6350647          | up                | NM_008415                | Jrk                | ASMM10m6ADR<br>ACA1002491884 | 1.650617095       | hyper             | NM_008415       | Jrk                |
|                                  | A_55_P2037618                                                         | 2.3672195          | up                | NM_001163502             | Elmsan1            | ASMM10m6ADR<br>ACA1001213974 | 1.592199006       | hyper             | NM_001163502    | Elmsan1            |
|                                  | A_55_P2037618                                                         | 2.3672195          | up                | NM_001163502             | Elmsan1            | ASMM10m6ADR<br>ACA1004272874 | 1.543864185       | hyper             | NM_001163502    | Elmsan1            |
|                                  | A_51_P464900                                                          | 2.0573089          | up                | NM_019439                | Gabbr1             | ASMM10m6ADR<br>ACA1001568954 | 1.542582563       | hyper             | NM_019439       | Gabbr1             |
|                                  | A_51_P350453                                                          | 1.7694033          | up                | NM_013743                | <b>Pdk4</b>        | ASMM10m6ADR<br>ACA1003465334 | 3.274455439       | hyper             | NM_013743       | Pdk4               |
|                                  | A_55_P1975405                                                         | 4.5682481          | up                | NM_178363                | Ylpm1              | ASMM10m6ADR<br>ACA1001110824 | 2.006191138       | hyper             | NM_178363       | Ylpm1              |
| Abundance_single<br>(hyper-down) | <b># FC(expression) &lt;= 0.66667 &amp; FC(methylation) &gt;= 1.5</b> |                    |                   |                          |                    |                              |                   |                   |                 |                    |
|                                  | <b>Probe Name</b>                                                     | <b>Fold Change</b> | <b>Regulation</b> | <b>Ref Seq Accession</b> | <b>Gene Symbol</b> | <b>Probe Name</b>            | <b>Foldchange</b> | <b>Regulation</b> | <b>Trans ID</b> | <b>Gene Symbol</b> |
|                                  | A_55_P2102540                                                         | 0.641531917        | down              | NM_133859                | Olfml3             | ASMM10m6ADR<br>ACA1001003554 | 1.87757875        | hyper             | NM_133859       | Olfml3             |
|                                  | A_51_P346272                                                          | 0.613575305        | down              | NM_178252                | Arhgap3            | ASMM10m6ADR                  | 1.507587323       | hyper             | NM_178252       | Arhgap33           |

|                               |                                                                       |                    |                   |                          |                              |                              |                   |                   |                 |                    |
|-------------------------------|-----------------------------------------------------------------------|--------------------|-------------------|--------------------------|------------------------------|------------------------------|-------------------|-------------------|-----------------|--------------------|
|                               |                                                                       |                    |                   | 3                        | ACA1004711654                |                              |                   |                   |                 |                    |
| A_51_P369862                  | 0.454795199                                                           | down               | NM_178772         | Nceh1                    | ASMM10m6ADR<br>ACA1002996504 | 1.502428499                  | hyper             | NM_178772         | Nceh1           |                    |
| A_55_P2007713                 | 0.631290813                                                           | down               | NM_053082         | Tspan4                   | ASMM10m6ADR<br>ACA1002423274 | 2.456322513                  | hyper             | NM_053082         | Tspan4          |                    |
| A_51_P409429                  | 0.37988901                                                            | down               | NM_146217         | Aars                     | ASMM10m6ADR<br>ACA1001806604 | 1.562428688                  | hyper             | NM_146217         | Aars            |                    |
| A_55_P2157922                 | 0.587352503                                                           | down               | NM_027175         | Ndufaf1                  | ASMM10m6ADR<br>ACA1001525294 | 1.598552927                  | hyper             | NM_027175         | Ndufaf1         |                    |
| A_55_P2154387                 | 0.587075199                                                           | down               | NM_007554         | Bmp4                     | ASMM10m6ADR<br>ACA1001841274 | 1.74056598                   | hyper             | NM_007554         | Bmp4            |                    |
| A_52_P625808                  | 0.510521829                                                           | down               | NM_031179         | Sf3b1                    | ASMM10m6ADR<br>ACA1004903294 | 1.554787112                  | hyper             | NM_031179         | Sf3b1           |                    |
| A_55_P1981544                 | 0.638077885                                                           | down               | NM_030717         | Lactb                    | ASMM10m6ADR<br>ACA1000620414 | 1.683117082                  | hyper             | NM_030717         | Lactb           |                    |
| A_66_P132855                  | 0.650355364                                                           | down               | NM_011714         | Baz1b                    | ASMM10m6ADR<br>ACA1001429384 | 3.548185316                  | hyper             | NM_011714         | Baz1b           |                    |
| A_51_P288891                  | 0.629503745                                                           | down               | NM_025706         | Tbc1d15                  | ASMM10m6ADR<br>ACA1003185054 | 1.587271702                  | hyper             | NM_025706         | Tbc1d15         |                    |
|                               | <b># FC(expression) &gt;= 1.5 &amp; FC(methylation) &lt;= 0.66667</b> |                    |                   |                          |                              |                              |                   |                   |                 |                    |
| Abundance_single<br>(hypo-up) | <b>Probe Name</b>                                                     | <b>Fold Change</b> | <b>Regulation</b> | <b>Ref Seq Accession</b> | <b>Gene Symbol</b>           | <b>Probe Name</b>            | <b>Foldchange</b> | <b>Regulation</b> | <b>Trans ID</b> | <b>Gene Symbol</b> |
|                               | A_55_P2028570                                                         | 1.6348844          | up                | NM_018822                | Sgsh                         | ASMM10m6ADR<br>ACA1000375384 | 0.569631518       | hypo              | NM_018822       | Sgsh               |
|                               | A_52_P47126                                                           | 1.5082209          | up                | NM_001004176             | Maml3                        | ASMM10m6ADR<br>ACA1003466624 | 0.605106169       | hypo              | NM_001004176    | Maml3              |

|               |           |    |              |          |                              |             |      |              |          |
|---------------|-----------|----|--------------|----------|------------------------------|-------------|------|--------------|----------|
| A_52_P664656  | 1.5823147 | up | NM_007396    | Acvr2a   | ASMM10m6ADR<br>ACA1002474404 | 0.620338065 | hypo | NM_007396    | Acvr2a   |
| A_55_P2030536 | 1.7431883 | up | NM_001097644 | Ccny11   | ASMM10m6ADR<br>ACA1003816784 | 0.594942051 | hypo | NM_001097644 | Ccny11   |
| A_55_P2134581 | 2.0542398 | up | NM_011112    | Papola   | ASMM10m6ADR<br>ACA1004253654 | 0.609465292 | hypo | NM_011112    | Papola   |
| A_55_P2147666 | 4.2632    | up | NM_001134460 | Prickle2 | ASMM10m6ADR<br>ACA1001298114 | 0.553710277 | hypo | NM_001134460 | Prickle2 |
| A_55_P2334684 | 1.5627696 | up | NM_001081267 | Rsf1     | ASMM10m6ADR<br>ACA1004718324 | 0.589777885 | hypo | NM_001081267 | Rsf1     |
| A_66_P139355  | 1.5206174 | up | NM_013735    | Trp53bp1 | ASMM10m6ADR<br>ACA1003174024 | 0.423999309 | hypo | NM_013735    | Trp53bp1 |
| A_55_P1985530 | 1.6637002 | up | NM_153421    | Phc3     | ASMM10m6ADR<br>ACA1003815544 | 0.631790324 | hypo | NM_153421    | Phc3     |
| A_55_P2387665 | 2.0072895 | up | NM_011388    | Slc10a2  | ASMM10m6ADR<br>ACA1001195274 | 0.323930378 | hypo | NM_011388    | Slc10a2  |
| A_55_P2166592 | 1.8132411 | up | NM_175229    | Srrm2    | ASMM10m6ADR<br>ACA1000443554 | 0.627919078 | hypo | NM_175229    | Srrm2    |
| A_52_P486464  | 2.2603662 | up | NM_001294279 | Zfp827   | ASMM10m6ADR<br>ACA1001401794 | 0.402086081 | hypo | NM_001294279 | Zfp827   |
| A_55_P2167249 | 2.7378121 | up | NM_001160399 | Ccdc112  | ASMM10m6ADR<br>ACA1002973474 | 0.389599122 | hypo | NM_001160399 | Ccdc112  |
| A_52_P215170  | 1.6826299 | up | NM_134247    | Acot4    | ASMM10m6ADR<br>ACA1003081494 | 0.631931174 | hypo | NM_134247    | Acot4    |
| A_51_P273705  | 1.9705596 | up | NM_013922    | Zfp354c  | ASMM10m6ADR<br>ACA1001280634 | 0.463635843 | hypo | NM_013922    | Zfp354c  |

|               |           |    |              |        |                              |             |      |              |        |
|---------------|-----------|----|--------------|--------|------------------------------|-------------|------|--------------|--------|
| A_55_P2084068 | 2.9703349 | up | NM_001122594 | Phlpp2 | ASMM10m6ADR<br>ACA1002387754 | 0.32740572  | hypo | NM_001122594 | Phlpp2 |
| A_55_P2074982 | 2.0856789 | up | NM_025281    | Lyar   | ASMM10m6ADR<br>ACA1000755044 | 0.424101516 | hypo | NM_025281    | Lyar   |
| A_66_P126138  | 1.647272  | up | NM_010881    | Ncoa1  | ASMM10m6ADR<br>ACA1000274664 | 0.60857081  | hypo | NM_010881    | Ncoa1  |
| A_52_P27020   | 1.7740657 | up | NM_199007    | Sgo2a  | ASMM10m6ADR<br>ACA1001388534 | 0.356801039 | hypo | NM_199007    | Sgo2a  |
| A_52_P618807  | 1.6084375 | up | NM_133656    | Crk    | ASMM10m6ADR<br>ACA1004369184 | 0.638476303 | hypo | NM_133656    | Crk    |
| A_52_P514352  | 1.5224908 | up | NM_021542    | Kcnk5  | ASMM10m6ADR<br>ACA1003879014 | 0.531274401 | hypo | NM_021542    | Kcnk5  |
| A_55_P2005903 | 1.8752725 | up | NM_008500    | Lhx6   | ASMM10m6ADR<br>ACA1001788984 | 0.607949724 | hypo | NM_008500    | Lhx6   |
| A_52_P642801  | 2.4445898 | up | NM_010690    | Lats1  | ASMM10m6ADR<br>ACA1000245744 | 0.646511486 | hypo | NM_010690    | Lats1  |
| A_52_P642801  | 2.4445898 | up | NM_010690    | Lats1  | ASMM10m6ADR<br>ACA1001328934 | 0.511102947 | hypo | NM_010690    | Lats1  |
| A_51_P228865  | 1.746535  | up | NM_001081680 | Zfp72  | ASMM10m6ADR<br>ACA1001521994 | 0.397758803 | hypo | NM_001081680 | Zfp72  |
| A_52_P227880  | 1.556808  | up | NM_001081363 | Cenpf  | ASMM10m6ADR<br>ACA1001673434 | 0.56687882  | hypo | NM_001081363 | Cenpf  |
| A_55_P2035812 | 2.1803255 | up | NM_176834    | Rnf208 | ASMM10m6ADR<br>ACA1002751704 | 0.59289363  | hypo | NM_176834    | Rnf208 |
| A_55_P2109589 | 2.3472644 | up | NM_018861    | Slc1a4 | ASMM10m6ADR<br>ACA1004373614 | 0.649991874 | hypo | NM_018861    | Slc1a4 |

|                                 |                                                                           |                    |                   |                          |                    |                              |                   |                   |                 |                    |
|---------------------------------|---------------------------------------------------------------------------|--------------------|-------------------|--------------------------|--------------------|------------------------------|-------------------|-------------------|-----------------|--------------------|
|                                 | A_51_P215887                                                              | 1.5325706          | up                | NM_019698                | Aldh18a1           | ASMM10m6ADR<br>ACA1000745784 | 0.637812616       | hypo              | NM_019698       | Aldh18a1           |
|                                 | A_55_P2146708                                                             | 1.6984574          | up                | NM_145453                | Zcchc9             | ASMM10m6ADR<br>ACA1003555434 | 0.464654707       | hypo              | NM_145453       | Zcchc9             |
|                                 | A_55_P2146708                                                             | 1.6984574          | up                | NM_145453                | Zcchc9             | ASMM10m6ADR<br>ACA1004477134 | 0.537478611       | hypo              | NM_145453       | Zcchc9             |
|                                 | A_55_P2050488                                                             | 1.7485729          | up                | NM_001024602             | Cep170b            | ASMM10m6ADR<br>ACA1002915474 | 0.659312821       | hypo              | NM_001024602    | Cep170b            |
|                                 | A_52_P533198                                                              | 2.7124861          | up                | NM_009584                | Dnajc2             | ASMM10m6ADR<br>ACA1001719774 | 0.438097513       | hypo              | NM_009584       | Dnajc2             |
|                                 | A_51_P259555                                                              | 1.8006269          | up                | NM_172876                | Gpatch3            | ASMM10m6ADR<br>ACA1002817354 | 0.65497947        | hypo              | NM_172876       | Gpatch3            |
|                                 | A_55_P2057132                                                             | 1.732236           | up                | NM_001077499             | Scn8a              | ASMM10m6ADR<br>ACA1004923624 | 0.614893034       | hypo              | NM_001077499    | Scn8a              |
|                                 | A_55_P2100997                                                             | 2.4152969          | up                | NM_001253705             | Pym1               | ASMM10m6ADR<br>ACA1002570774 | 0.317754558       | hypo              | NM_001253705    | Pym1               |
|                                 | A_55_P2053032                                                             | 1.5038131          | up                | NM_201368                | Xkr8               | ASMM10m6ADR<br>ACA1004153054 | 0.652843343       | hypo              | NM_201368       | Xkr8               |
|                                 | A_55_P1975405                                                             | 4.5682481          | up                | NM_178363                | Ylpm1              | ASMM10m6ADR<br>ACA1002577374 | 0.350683665       | hypo              | NM_178363       | Ylpm1              |
| Abundance_single<br>(hypo-down) | <b># FC(expression) &lt;= 0.66667 &amp; FC(methylation) &lt;= 0.66667</b> |                    |                   |                          |                    |                              |                   |                   |                 |                    |
|                                 | <b>Probe Name</b>                                                         | <b>Fold Change</b> | <b>Regulation</b> | <b>Ref Seq Accession</b> | <b>Gene Symbol</b> | <b>Probe Name</b>            | <b>Foldchange</b> | <b>Regulation</b> | <b>Trans ID</b> | <b>Gene Symbol</b> |
|                                 | A_55_P2137206                                                             | 0.484524224        | down              | NM_009370                | Tgfbr1             | ASMM10m6ADR<br>ACA1001405714 | 0.307658748       | hypo              | NM_009370       | Tgfbr1             |
|                                 | A_55_P2308488                                                             | 0.611100929        | down              | NM_009384                | Tiam1              | ASMM10m6ADR                  | 0.463366083       | hypo              | NM_009384       | Tiam1              |

|               |             |      |              |         |                              |             |      |              |         |
|---------------|-------------|------|--------------|---------|------------------------------|-------------|------|--------------|---------|
|               |             |      |              |         | ACA1002132974                |             |      |              |         |
| A_55_P2157922 | 0.587352503 | down | NM_027175    | Ndufaf1 | ASMM10m6ADR<br>ACA1004159574 | 0.655238388 | hypo | NM_027175    | Ndufaf1 |
| A_51_P278230  | 0.622471133 | down | NM_172162    | Hinfp   | ASMM10m6ADR<br>ACA1004941184 | 0.577501391 | hypo | NM_172162    | Hinfp   |
| A_55_P2041265 | 0.50996947  | down | NM_144826    | Utp6    | ASMM10m6ADR<br>ACA1002142174 | 0.647528273 | hypo | NM_144826    | Utp6    |
| A_51_P224227  | 0.607064101 | down | NM_001346660 | Rlf     | ASMM10m6ADR<br>ACA1000202524 | 0.619233605 | hypo | NM_001346660 | Rlf     |
| A_55_P2136817 | 0.566465492 | down | NM_175484    | Coro2b  | ASMM10m6ADR<br>ACA1001469584 | 0.574709801 | hypo | NM_175484    | Coro2b  |
| A_52_P62121   | 0.63456999  | down | NM_010338    | Gpr37   | ASMM10m6ADR<br>ACA1002680804 | 0.559609829 | hypo | NM_010338    | Gpr37   |
| A_52_P391081  | 0.622951308 | down | NM_172162    | Hinfp   | ASMM10m6ADR<br>ACA1004941184 | 0.577501391 | hypo | NM_172162    | Hinfp   |
| A_66_P115053  | 0.604432594 | down | NM_130889    | Anp32b  | ASMM10m6ADR<br>ACA1003996454 | 0.528531612 | hypo | NM_130889    | Anp32b  |
| A_55_P2114069 | 0.592059125 | down | NM_029762    | Hyls1   | ASMM10m6ADR<br>ACA1003138094 | 0.570631831 | hypo | NM_029762    | Hyls1   |
| A_55_P1968698 | 0.530803031 | down | NM_001085492 | Rere    | ASMM10m6ADR<br>ACA1001838734 | 0.335483493 | hypo | NM_001085492 | Rere    |
| A_66_P132855  | 0.650355364 | down | NM_011714    | Baz1b   | ASMM10m6ADR<br>ACA1003065064 | 0.428822717 | hypo | NM_011714    | Baz1b   |
| A_66_P132855  | 0.650355364 | down | NM_011714    | Baz1b   | ASMM10m6ADR<br>ACA1001871124 | 0.666499084 | hypo | NM_011714    | Baz1b   |
| A_55_P1985673 | 0.661128831 | down | NM_173424    | Zbtb37  | ASMM10m6ADR                  | 0.516919109 | hypo | NM_173424    | Zbtb37  |



|                                                   |                                                                       |                    |                   |                          |                    |                              |                   |                   |                 |                    |
|---------------------------------------------------|-----------------------------------------------------------------------|--------------------|-------------------|--------------------------|--------------------|------------------------------|-------------------|-------------------|-----------------|--------------------|
|                                                   |                                                                       |                    |                   |                          |                    | ACA1001704334                |                   |                   |                 |                    |
|                                                   | A_55_P2072333                                                         | 0.639990702        | down              | NM_001077499             | Scn8a              | ASMM10m6ADR<br>ACA1004923624 | 0.614893034       | hypo              | NM_001077499    | Scn8a              |
|                                                   | A_52_P235861                                                          | 0.626876044        | down              | NM_008817                | Peg3               | ASMM10m6ADR<br>ACA1002239184 | 0.634873167       | hypo              | NM_008817       | Peg3               |
|                                                   | A_65_P20174                                                           | 0.570389192        | down              | NM_172303                | Jade1              | ASMM10m6ADR<br>ACA1003656544 | 0.589175892       | hypo              | NM_172303       | Jade1              |
|                                                   | A_55_P2070069                                                         | 0.49491698         | down              | NM_001081175             | Itpkb              | ASMM10m6ADR<br>ACA1000629964 | 0.649924036       | hypo              | NM_001081175    | Itpkb              |
|                                                   | A_55_P2070069                                                         | 0.49491698         | down              | NM_001081175             | Itpkb              | ASMM10m6ADR<br>ACA1003627674 | 0.643611419       | hypo              | NM_001081175    | Itpkb              |
|                                                   | A_55_P2159234                                                         | 0.632922128        | down              | NM_001347356             | Tatdn2             | ASMM10m6ADR<br>ACA1003334334 | 0.485805499       | hypo              | NM_001347356    | Tatdn2             |
|                                                   | <b># FC(expression) &gt;= 1.5 &amp; FC(methylation) &lt;= 0.66667</b> |                    |                   |                          |                    |                              |                   |                   |                 |                    |
| methylation<br>stoichiometry_cluster<br>(hypo-up) | <b>Probe Name</b>                                                     | <b>Fold Change</b> | <b>Regulation</b> | <b>Ref Seq Accession</b> | <b>Gene Symbol</b> | <b>Cluster id</b>            | <b>Foldchange</b> | <b>Regulation</b> | <b>Trans ID</b> | <b>Gene Symbol</b> |
|                                                   | A_52_P664656                                                          | 1.5823147          | up                | NM_007396                | Acvr2a             | NM_007396-1                  | 0.581639801       | hypo              | NM_007396       | Acvr2a             |
|                                                   | A_52_P486464                                                          | 2.2603662          | up                | NM_001294279             | Zfp827             | NM_001294279-7               | 0.404397682       | hypo              | NM_001294279    | Zfp827             |
|                                                   | <b># FC(expression) &gt;= 1.5 &amp; FC(methylation) &gt;= 1.5</b>     |                    |                   |                          |                    |                              |                   |                   |                 |                    |
| methylation<br>stoichiometry_multi<br>(hyper-up)  | <b>Probe Name</b>                                                     | <b>Fold Change</b> | <b>Regulation</b> | <b>Ref Seq Accession</b> | <b>Gene Symbol</b> | <b>Probe Name</b>            | <b>Foldchange</b> | <b>Regulation</b> | <b>Trans ID</b> | <b>Gene Symbol</b> |
|                                                   | A_55_P1977071                                                         | 1.6611844          | up                | NM_028666                | Fam110a            | ASMM10m6ADR<br>ACA1000966094 | 1.749984061       | hyper             | NM_028666       | Fam110a            |
|                                                   | A_55_P2334684                                                         | 1.5627696          | up                | NM_001081267             | Rsf1               | ASMM10m6ADR<br>ACA1004158464 | 1.67000824        | hyper             | NM_001081267    | Rsf1               |
| methylation                                       | <b># FC(expression) &gt;= 1.5 &amp; FC(methylation) &lt;= 0.66667</b> |                    |                   |                          |                    |                              |                   |                   |                 |                    |

|                                                     |                                                                       |                    |                   |                          |                    |                              |                   |                   |                 |                    |  |
|-----------------------------------------------------|-----------------------------------------------------------------------|--------------------|-------------------|--------------------------|--------------------|------------------------------|-------------------|-------------------|-----------------|--------------------|--|
| stoichiometry_multi<br>(hypo-up)                    | <b>Probe Name</b>                                                     | <b>Fold Change</b> | <b>Regulation</b> | <b>Ref Seq Accession</b> | <b>Gene Symbol</b> | <b>Probe Name</b>            | <b>Foldchange</b> | <b>Regulation</b> | <b>Trans ID</b> | <b>Gene Symbol</b> |  |
|                                                     | A_55_P2086075                                                         | 1.657949           | up                | NM_009459                | Ube2h              | ASMM10m6ADR<br>ACA1004712144 | 0.589151885       | hypo              | NM_009459       | Ube2h              |  |
|                                                     | A_52_P104761                                                          | 1.7758885          | up                | NM_011276                | Rlim               | ASMM10m6ADR<br>ACA1002362214 | 0.34745118        | hypo              | NM_011276       | Rlim               |  |
|                                                     | A_55_P2134581                                                         | 2.0542398          | up                | NM_011112                | Papola             | ASMM10m6ADR<br>ACA1004888864 | 0.661478121       | hypo              | NM_011112       | Papola             |  |
| methylation<br>stoichiometry_single<br>(hyper-up)   | <b># FC(expression) &gt;= 1.5 &amp; FC(methylation) &gt;= 1.5</b>     |                    |                   |                          |                    |                              |                   |                   |                 |                    |  |
|                                                     | <b>Probe Name</b>                                                     | <b>Fold Change</b> | <b>Regulation</b> | <b>Ref Seq Accession</b> | <b>Gene Symbol</b> | <b>Probe Name</b>            | <b>Foldchange</b> | <b>Regulation</b> | <b>Trans ID</b> | <b>Gene Symbol</b> |  |
|                                                     | A_52_P505143                                                          | 1.6350647          | up                | NM_008415                | Jrk                | ASMM10m6ADR<br>ACA1002491884 | 1.976358609       | hyper             | NM_008415       | Jrk                |  |
|                                                     | A_55_P2037618                                                         | 2.3672195          | up                | NM_001163502             | Elmsan1            | ASMM10m6ADR<br>ACA1003506094 | 1.605820267       | hyper             | NM_001163502    | Elmsan1            |  |
| methylation<br>stoichiometry_single<br>(hyper-down) | <b># FC(expression) &lt;= 0.66667 &amp; FC(methylation) &gt;= 1.5</b> |                    |                   |                          |                    |                              |                   |                   |                 |                    |  |
|                                                     | <b>Probe Name</b>                                                     | <b>Fold Change</b> | <b>Regulation</b> | <b>Ref Seq Accession</b> | <b>Gene Symbol</b> | <b>Probe Name</b>            | <b>Foldchange</b> | <b>Regulation</b> | <b>Trans ID</b> | <b>Gene Symbol</b> |  |
|                                                     | A_55_P2102540                                                         | 0.641531917        | down              | NM_133859                | Olfml3             | ASMM10m6ADR<br>ACA1001003554 | 1.506242477       | hyper             | NM_133859       | Olfml3             |  |
|                                                     | A_66_P132855                                                          | 0.650355364        | down              | NM_011714                | Baz1b              | ASMM10m6ADR<br>ACA1001429384 | 2.306483394       | hyper             | NM_011714       | Baz1b              |  |
| methylation<br>stoichiometry_single<br>(hypo-up)    | <b># FC(expression) &gt;= 1.5 &amp; FC(methylation) &lt;= 0.66667</b> |                    |                   |                          |                    |                              |                   |                   |                 |                    |  |
|                                                     | <b>Probe Name</b>                                                     | <b>Fold Change</b> | <b>Regulation</b> | <b>Ref Seq Accession</b> | <b>Gene Symbol</b> | <b>Probe Name</b>            | <b>Foldchange</b> | <b>Regulation</b> | <b>Trans ID</b> | <b>Gene Symbol</b> |  |
|                                                     | A_55_P2028570                                                         | 1.6348844          | up                | NM_018822                | Sgsh               | ASMM10m6ADR                  | 0.425527248       | hypo              | NM_018822       | Sgsh               |  |

|               |           |    |              |          |                              |             |      |              |          |
|---------------|-----------|----|--------------|----------|------------------------------|-------------|------|--------------|----------|
|               |           |    |              |          | ACA1000375384                |             |      |              |          |
| A_55_P1964009 | 1.7294531 | up | NM_001033299 | Zfp217   | ASMM10m6ADR<br>ACA1001036024 | 0.658418566 | hypo | NM_001033299 | Zfp217   |
| A_52_P664656  | 1.5823147 | up | NM_007396    | Acvr2a   | ASMM10m6ADR<br>ACA1002474404 | 0.581639801 | hypo | NM_007396    | Acvr2a   |
| A_55_P2030536 | 1.7431883 | up | NM_001097644 | Ccny11   | ASMM10m6ADR<br>ACA1003816784 | 0.66138687  | hypo | NM_001097644 | Ccny11   |
| A_66_P139355  | 1.5206174 | up | NM_013735    | Trp53bp1 | ASMM10m6ADR<br>ACA1003174024 | 0.588026993 | hypo | NM_013735    | Trp53bp1 |
| A_55_P1985530 | 1.6637002 | up | NM_153421    | Phc3     | ASMM10m6ADR<br>ACA1003815544 | 0.612476386 | hypo | NM_153421    | Phc3     |
| A_52_P486464  | 2.2603662 | up | NM_001294279 | Zfp827   | ASMM10m6ADR<br>ACA1001401794 | 0.404397682 | hypo | NM_001294279 | Zfp827   |
| A_55_P2167249 | 2.7378121 | up | NM_001160399 | Ccdc112  | ASMM10m6ADR<br>ACA1002973474 | 0.620065624 | hypo | NM_001160399 | Ccdc112  |
| A_51_P273705  | 1.9705596 | up | NM_013922    | Zfp354c  | ASMM10m6ADR<br>ACA1001280634 | 0.555711529 | hypo | NM_013922    | Zfp354c  |
| A_52_P27020   | 1.7740657 | up | NM_199007    | Sgo2a    | ASMM10m6ADR<br>ACA1001388534 | 0.39158495  | hypo | NM_199007    | Sgo2a    |
| A_55_P2005903 | 1.8752725 | up | NM_008500    | Lhx6     | ASMM10m6ADR<br>ACA1001788984 | 0.537588566 | hypo | NM_008500    | Lhx6     |
| A_51_P228865  | 1.746535  | up | NM_001081680 | Zfp72    | ASMM10m6ADR<br>ACA1001521994 | 0.466728387 | hypo | NM_001081680 | Zfp72    |
| A_52_P227880  | 1.556808  | up | NM_001081363 | Cenpf    | ASMM10m6ADR<br>ACA1001673434 | 0.642047062 | hypo | NM_001081363 | Cenpf    |
| A_55_P2035812 | 2.1803255 | up | NM_176834    | Rnf208   | ASMM10m6ADR                  | 0.641987391 | hypo | NM_176834    | Rnf208   |

|                                                    |                                                                           |                    |                   |                          |                    |                              |                   |                   |                 |                    |
|----------------------------------------------------|---------------------------------------------------------------------------|--------------------|-------------------|--------------------------|--------------------|------------------------------|-------------------|-------------------|-----------------|--------------------|
|                                                    |                                                                           |                    |                   |                          |                    | ACA1002751704                |                   |                   |                 |                    |
|                                                    | A_55_P2037618                                                             | 2.3672195          | up                | NM_001163502             | Elmsan1            | ASMM10m6ADR<br>ACA1004272874 | 0.616964725       | hypo              | NM_001163502    | Elmsan1            |
|                                                    | A_55_P2146708                                                             | 1.6984574          | up                | NM_145453                | Zcchc9             | ASMM10m6ADR<br>ACA1003555434 | 0.501620924       | hypo              | NM_145453       | Zcchc9             |
|                                                    | A_55_P2146708                                                             | 1.6984574          | up                | NM_145453                | Zcchc9             | ASMM10m6ADR<br>ACA1004477134 | 0.580816824       | hypo              | NM_145453       | Zcchc9             |
|                                                    | A_52_P533198                                                              | 2.7124861          | up                | NM_009584                | Dnajc2             | ASMM10m6ADR<br>ACA1001719774 | 0.428975958       | hypo              | NM_009584       | Dnajc2             |
|                                                    | A_52_P329185                                                              | 1.6250993          | up                | NM_013875                | Pde7b              | ASMM10m6ADR<br>ACA1002013144 | 0.606060377       | hypo              | NM_013875       | Pde7b              |
|                                                    | A_55_P2100997                                                             | 2.4152969          | up                | NM_001253705             | Pym1               | ASMM10m6ADR<br>ACA1002570774 | 0.61941399        | hypo              | NM_001253705    | Pym1               |
|                                                    | A_55_P1975405                                                             | 4.5682481          | up                | NM_178363                | Ylpm1              | ASMM10m6ADR<br>ACA1002577374 | 0.539194865       | hypo              | NM_178363       | Ylpm1              |
|                                                    | <b># FC(expression) &lt;= 0.66667 &amp; FC(methylation) &lt;= 0.66667</b> |                    |                   |                          |                    |                              |                   |                   |                 |                    |
|                                                    | <b>Probe Name</b>                                                         | <b>Fold Change</b> | <b>Regulation</b> | <b>Ref Seq Accession</b> | <b>Gene Symbol</b> | <b>Probe Name</b>            | <b>Foldchange</b> | <b>Regulation</b> | <b>Trans ID</b> | <b>Gene Symbol</b> |
| methylation<br>stoichiometry_single<br>(hypo-down) | A_55_P2137206                                                             | 0.484524224        | down              | NM_009370                | Tgfbr1             | ASMM10m6ADR<br>ACA1001405714 | 0.405942805       | hypo              | NM_009370       | Tgfbr1             |
|                                                    | A_55_P2308488                                                             | 0.611100929        | down              | NM_009384                | Tiam1              | ASMM10m6ADR<br>ACA1002132974 | 0.60302223        | hypo              | NM_009384       | Tiam1              |
|                                                    | A_55_P2157922                                                             | 0.587352503        | down              | NM_027175                | Ndufaf1            | ASMM10m6ADR<br>ACA1004159574 | 0.66378011        | hypo              | NM_027175       | Ndufaf1            |
|                                                    | A_52_P351925                                                              | 0.627705095        | down              | NM_146005                | Ank3               | ASMM10m6ADR<br>ACA1003223864 | 0.588850247       | hypo              | NM_146005       | Ank3               |

|               |             |      |              |        |                              |             |      |              |        |
|---------------|-------------|------|--------------|--------|------------------------------|-------------|------|--------------|--------|
| A_55_P2041265 | 0.50996947  | down | NM_144826    | Utp6   | ASMM10m6ADR<br>ACA1002142174 | 0.58758343  | hypo | NM_144826    | Utp6   |
| A_66_P115053  | 0.604432594 | down | NM_130889    | Anp32b | ASMM10m6ADR<br>ACA1003996454 | 0.499583082 | hypo | NM_130889    | Anp32b |
| A_55_P1968698 | 0.530803031 | down | NM_001085492 | Rere   | ASMM10m6ADR<br>ACA1001838734 | 0.399030635 | hypo | NM_001085492 | Rere   |
| A_55_P1968698 | 0.530803031 | down | NM_001085492 | Rere   | ASMM10m6ADR<br>ACA1002742504 | 0.661265724 | hypo | NM_001085492 | Rere   |
| A_66_P132855  | 0.650355364 | down | NM_011714    | Baz1b  | ASMM10m6ADR<br>ACA1001630074 | 0.654830878 | hypo | NM_011714    | Baz1b  |
| A_66_P132855  | 0.650355364 | down | NM_011714    | Baz1b  | ASMM10m6ADR<br>ACA1003065064 | 0.389631961 | hypo | NM_011714    | Baz1b  |
| A_51_P156564  | 0.634856706 | down | NM_028365    | Zfp839 | ASMM10m6ADR<br>ACA1002537724 | 0.596132289 | hypo | NM_028365    | Zfp839 |
| A_65_P20174   | 0.570389192 | down | NM_172303    | Jade1  | ASMM10m6ADR<br>ACA1003656544 | 0.516154522 | hypo | NM_172303    | Jade1  |
