# Supplementary material for: The landscape of N 6-methyladenosine modification patterns and altered transcript profiles in the cardiac-specific deletion of natriuretic peptide receptor A
Source: Royal Society of Chemistry journal article supplement (doi:10.1039/d2mo00201a), 2022-10-31
Supplement: d2mo00201a12.pdf [file d2mo00201a12.pdf]

Supplementary Table 3: The 8 m6A site abundance hypomethylated m6A cluster between NPRA<sup>-/-</sup> vs NPRA<sup>+/+</sup>.

| Trans ID         | Fold change | P value     | Peak Sequence                                                                                                                                                                                                                                                                                                                                                                                                                                                                                                                                                            | Gene Symbol | m6A motif Sequence                      |
|------------------|-------------|-------------|--------------------------------------------------------------------------------------------------------------------------------------------------------------------------------------------------------------------------------------------------------------------------------------------------------------------------------------------------------------------------------------------------------------------------------------------------------------------------------------------------------------------------------------------------------------------------|-------------|-----------------------------------------|
| NM_0012<br>94279 | 0.402086081 | 0.001293019 | 1..4251<br>gcgcctcccagcatcccctcaccctcactcctcctgcctatcttggACTAAGAGAAAGAGCAGGGACTGT<br>CTGAGGACAGCCGCGTTCTGTACCAA <del>AA</del> CAAGAGACAGAGACAGGAACAGAA<br>CAAAACCACAAAAC <del>T</del> AAAACAACCCACAGGTGTATGTTGCTGCAAAA<br>CCTTCAGACCCAGGGGTCTGGA <del>ct</del> gtgtactgtatatcttagtaaggaatagagaattggctctgtatg<br>4506..7609                                                                                                                                                                                                                                               | Zfp827      | GGACA                                   |
| NM_0013<br>55499 | 0.57499309  | 0.04486493  | 1..1171<br>gattcctcgatcctatacaccacaacggagcatcccagccaacaaaACTGTCCACAACGTTGCCAGAGA<br>TAGAATATCGAGAAAAAGGGAAAGAGAAGG <del>CA</del> AGGATGCCAAGAA <del>C</del> ACAA<br>CCTTGGAATAAA <del>T</del> AACAACATTCTACAACCTGTAGACTCTAAGATACAAGA<br>GATTGAGTATATGGAA <del>AA</del> ACCATATCAATAGTAAAAGATTAA <del>CA</del> ATGATCTTGT<br>GGGAAGTACAGAAAATCTCTTAAAAGA <del>GGA</del> ctcatgcactgctcctcaaaaattacaaaatgccagt<br>ggagttgtga 1485..4092                                                                                                                                    | Maco1       | GGACA;AAACA;TAACA;<br>GGACA;AAACA;TAACA |
| NM_0013<br>57952 | 0.514332853 | 0.038567165 | 1..2865<br>gcagcaagatgggacaacggagacagcagcaaaagcactgagacaagtACTTTGAAAATATTGAATCCC<br>CTCTCAATGAGAGGGGCTCTTCCACCTCTGTGGATAATCGAGA <del>ACTTGA</del> ACAGC<br>ACATTCAGACTTCTGACCCAGAA <del>ACTTTC</del> AGTCTGAGGAACGCTCGGACTCAG<br>ATGTGAATAA <del>TG</del> ACCGGAGTACAAGTTCGGTAGACA <del>GTGATATTCTTAGCTCCA</del><br>GTCACAGCAGTGACACTTTGTGCAATGCAGACAGCGCTCAGATTCTCTGGCCA<br>ATGGACTTGACTCTCACAGTATCACAAGTAGTAGAAGAACTAAAGCAAACGAGG<br>GGAAAAAGGAGACCTGG <del>CA</del> CAGCTGAAGAAGACTCTGGGA <del>ct</del> gacagtgaatatgacg<br>agagtggaagagcagggggacatgcagtac 3299..5600 | Usp47       | GGACA                                   |

|                  |             |             |                                                                                                                                                                                                                                                                                                                                                                                                                      |         |       |
|------------------|-------------|-------------|----------------------------------------------------------------------------------------------------------------------------------------------------------------------------------------------------------------------------------------------------------------------------------------------------------------------------------------------------------------------------------------------------------------------|---------|-------|
| NM_0013<br>60003 | 0.536567779 | 0.016043736 | 1..3637<br>tccagactctgtttgaaatgtcgggtatcaaagtagaaggaaaaagagagACAGAAAAAGATCTCAGAAGAA<br>AAAAAATAAGTCTTTGGACCCGAAGAAATCACCCAGGTTTCAGAGCGGACTGC<br>TAATAATAATGTGTGTATTGATCGAGGAAAAAGTGC GGAGGGGGGAGGGGCGG<br>TGTGAAAAATGGCAGAAGGACCAGAGCCTTGCAAGCCACAGActtggccactttactctgctt<br>aagttctctggtcttgagtacgtggcatt 3911..4168                                                                                                | Ppp2r2c | AGACA |
| NM_0073<br>96    | 0.620338065 | 0.014993512 | 1..2126<br>cattactacagaggacattgtaacagtggtcacaatggtgacaaatgtgACTTTCCTCCCAAAGAATCTAGTC<br>TATGATGGTGGCACCGTCTGTACACACTGAGGACTGGGACTCTGAACTGGAGCT<br>GCTAAGCTAAGGAAAGTGCTTAGTTGATTTTCTGTGTGAAATGAGTAGGATGCCT<br>CCAGGACATGTACGCAAGCAGCCCTTGTGGAAAGCATGGATCTGGGAGATGGA<br>TCTGGGAACTTACTGCATCGTCTGCAGCACAGATATGAAGAGGAGTCTAAGGG<br>AAAAGCTGCAACTGTAAAGAAActtctgaaaatgtactegaagaatgtggccctctccaatcaaggatctt<br>2490..5681 | Acvr2a  | GGACA |
| NM_0137<br>20    | 0.542535064 | 0.016826099 | 1..6591<br>tctaactcacaggcagaggccaagaaggattgtgaagattctctgggaaaggACAGTCTTAGAGAGAGATGGA<br>GAAACACCTAAAGGGCCCTTAACTCAGAAGTACATTGGAATTCACAGAACT<br>TTAACAAAGAGGCAAACGTTTCAGTTCTTTACAGAAATGAAGCCATGTCAAGAAA<br>ATTCTGAACAAGGATATCTCTGAATTACTTGAAAAAGTGAAActttagagagtgtggagttc<br>taaaaactgaggatggttctggagtggc 6865..13931                                                                                                 | Mga     | GGACA |
| NM_1770<br>77    | 0.463373718 | 0.002624413 | 1..4124<br>gaatacacaaaacttactagccagcagagagcccaggcctgtggaagagaagACAAGGAGATCTCTCGAAGCC<br>CTCAGTCTGTGACCAGTGAGAAGTACTCCACAACCTGACTGACTGAGAAGGA<br>AGGAAAGGCCCTTTCTTACCAGGGCTTGTACAGCCTTCAGTGTAGAGAGTGGGC<br>TGTCAACACATTTGTCCTTTGGGGAActtttaatcactccatctgtgctgtctagtggccactctgtccc<br>4381..5440                                                                                                                       | Exoc6b  | AGACA |

|               |             |             |                                                                                                                                                                                                                                                                                                                                         |      |             |
|---------------|-------------|-------------|-----------------------------------------------------------------------------------------------------------------------------------------------------------------------------------------------------------------------------------------------------------------------------------------------------------------------------------------|------|-------------|
| NR_1564<br>45 | 0.321254734 | 0.000264501 | 1..530<br>aacatcaagaaccaaccaccaactgaagaaaggcagtcgtttggaaagACATTA <u>ACTCTGA</u> ACACAGAC<br>TTTGTTTCATTAAGACAAGTTCCTATAAATATGATTTATATGAAAAAACTTTGA<br>AGTACAATTCAGACTTACTTAGCAGTAGAACTGTGTAAGAAAGAAAGGAGACG<br>GGTGTGGTGGATTTGGGGAACCACTTCTGTACCTGAAGCAAGAGAAACCCACG<br>CTGGActggaatactcagaatataatggaacggaaggctctcagccataagga 822..1981 | Zfp1 | AGACA;GAACA |
|---------------|-------------|-------------|-----------------------------------------------------------------------------------------------------------------------------------------------------------------------------------------------------------------------------------------------------------------------------------------------------------------------------------------|------|-------------|
