# Supplementary material for: The landscape of N 6-methyladenosine modification patterns and altered transcript profiles in the cardiac-specific deletion of natriuretic peptide receptor A
Source: Royal Society of Chemistry journal article supplement (doi:10.1039/d2mo00201a), 2022-10-31
Supplement: d2mo00201a13.pdf [file d2mo00201a13.pdf]

Supplementary Table 4: The top 10 m6A site abundance hypermethylated multi nucleotide m6A site between NPRA<sup>-/-</sup> vs NPRA<sup>+/+</sup>.

| Trans ID     | Fold change | P value     | Gene Symbol | m6A motif Sequence | transcript_Sequence                                                                               |
|--------------|-------------|-------------|-------------|--------------------|---------------------------------------------------------------------------------------------------|
| NM_001347445 | 2.849791118 | 0.001282253 | Med13l      | GGACA;GAACA        | 1..3840<br>gacttATGACCGTGTGCAGGCAGATAACAATGATTACTGGACAGAGT<br>GCTTCAACGCATTGGAACagggga 3912..9322 |
| NM_133218    | 2.182766399 | 0.007543886 | Zfp704      | AGACA;GAACA        | 1..7973<br>gaggcTTCCTTCCAGAGACTGTGTGCGCATTAGACACTTTAGAACA<br>GCTGGAAAAGGACTGCAGatgtt 8044..13844  |
| NM_001363439 | 2.165332147 | 5.24077E-05 | Sirt7       | GAACA              | 1..1377<br>gaagaAAGTGGCATAGCCCGGAGTTGACAAAAGACAGTTGGCACTTT<br>GCAGATGGCTTGACCCTTgttca 1448..1870  |
| NM_001081278 | 2.152381387 | 0.024453912 | Tbc1d4      | AGACA;GAACA        | 1..4318<br>ggaacAAGATAAAATGGCATATCAAAAAGACAGTGGAACAGATCCGG<br>AAGCTGCTACCAGCAGATGcgctg 4389..6641 |
| NM_001024926 | 2.108666634 | 0.043858803 | Cyb5d2      | TGACA;TGACA        | 1..1345<br>ggtaaTTGACTGAGCTCTTAACCTCTGACATTTGTGACATTTCTAAAA<br>CCTCTACTCCAGGGCAAactga 1416..2376  |
| NM_001081300 | 2.074368061 | 0.013428668 | Tshz1       | AGACA              | 1..4887<br>aacgaGCTATTATATGCAGGACTGGTTTGTGACAAGACATGCATGCA<br>GCGGTTGGAGACGAAAGctgtc 4958..5717   |
| NM_025862    | 1.998524368 | 0.011954037 | Acad8       | AGACA;GAACA        | 1..1420<br>tgageTGTCAGCCACGCTGCTGGTTCTGAGACAAGAACAGAGTTCTT<br>AGCAGAGCTAGAAGGGCTgctct 1491..2864  |
| NR_030711    | 1.98227468  | 0.019210282 | Mir22hg     | TAACA;AAACA        | 1..737<br>cagcaAATTCAAAAAGAGATTCAAATGTGTAACACTGTGGGAAAACA<br>TATCTATGACTGGGGTTGtagct 808..1766    |

|              |             |             |       |             |                                                                                                                     |
|--------------|-------------|-------------|-------|-------------|---------------------------------------------------------------------------------------------------------------------|
| NM_027276    | 1.968573842 | 0.024412785 | Cdc16 | AGACA;AGACA | 1..1734<br>ggattCGGAAGCTTATATCGGAGCAG <u>AC</u> ATTAAAG <u>ACA</u> AAATTAAGT<br>GCTATGACTTCGATGTGCataca 1805..2334  |
| NM_001081267 | 1.949281992 | 0.042492085 | RsfI  | GAACA;GGACA | 1..1590<br>gtcagAAAGCAAGGTTAGAGGAGCCTGGGCTTCTGA <u>AC</u> ATGG <u>AC</u> ATG<br>CCTCTCGAACCTTCTGAGaaagc 1661..11129 |
