# Supplementary material for: The landscape of N 6-methyladenosine modification patterns and altered transcript profiles in the cardiac-specific deletion of natriuretic peptide receptor A
Source: Royal Society of Chemistry journal article supplement (doi:10.1039/d2mo00201a), 2022-10-31
Supplement: d2mo00201a14.pdf [file d2mo00201a14.pdf]

Supplementary Table 5: The top 10 m6A site abundance hypomethylated multi nucleotide m6A site between NPRA<sup>-/-</sup> vs NPRA<sup>+/+</sup>.

| Trans ID     | Fold change | P value     | Gene Symbol | m6A motif Sequence | Transcript Sequence                                                                                              |
|--------------|-------------|-------------|-------------|--------------------|------------------------------------------------------------------------------------------------------------------|
| NM_011567    | 0.663165532 | 0.040496124 | Tead4       | GGACA;GGACA        | 1..1850<br>tgagaGACTTGGAGAGCAATGGTAGGGGGG <u>G</u> CAAGTCCAGG <u>A</u> CATGGGGACCTGGGAGGGGACCTtcagg 1921..3076   |
| NM_178065    | 0.66161237  | 0.040059418 | Are11       | GGACA              | 1..3081<br>cctgcTTGGCTCCCAAGCTCTCTAGAGCATCTGG <u>A</u> CACATGTTAACAAGCATAGCCACTGACCTTaaacca 3152..5404           |
| NM_001160400 | 0.660570376 | 0.036890548 | Megf8       | GGACA              | 1..7604<br>tgtttGGCGTCCAACCCAAGTTCACCAATGTGG <u>A</u> CATTTCGCCTGACACTAGACGTGACCTTCGGCgctgt 7675..10040          |
| NM_009621    | 0.658691095 | 0.032453887 | Adamts1     | AGACA;GGACA        | 1..3019<br>tcaggTTGGCAGAGAAGAGTAGTGCACTGCAGAG <u>A</u> CATTAACGG <u>A</u> CACCCTGCTTCCGAATGTGCaagg 3090..4883    |
| NM_026183    | 0.65132725  | 0.021203393 | Slc47a1     | AGACA;AAACA        | 1..1915<br>tctctCTTTGGGTGTGTGTTTGGAGAGAGACAGAGAGAGGGAG <u>A</u> CACCCCCCAAGAGATATAAA <u>A</u> Cagaaag 1987..2634 |
| NM_001048250 | 0.649230673 | 0.034245272 | Smim15      | AAACA;AAACA        | 1..325<br>agccaGAGAGAAGGAGCAAAAGAAGAA <u>A</u> CAAAACGGCAAGAAA <u>A</u> CATCGCAAAAGCTAAACGACtaaag 396..1864      |
| NM_011997    | 0.648794555 | 0.04380147  | Casp8ap2    | GGACA;AGACA        | 1..2410<br>tctgaAGATGCCAGCCAAGAATTGG <u>A</u> CACCAAAAG <u>A</u> CACGATGGTATAAATGCTTGCTATTTTcgaag 2481..6813     |
| NM_001168253 | 0.647342273 | 0.045259656 | Fam83h      | AGACA;GGACA        | 1..1768<br>gggccAGCGTTTTCCATGCCAAGCAACCTTGAG <u>A</u> CAAGGCCTGG <u>A</u> CACCGCTTCGAGGCAGAACctgag 1839..4535    |

|              |             |             |        |             |                                                                                                   |
|--------------|-------------|-------------|--------|-------------|---------------------------------------------------------------------------------------------------|
| NM_010518    | 0.646602254 | 0.047226865 | Igfbp5 | GGACA;GGACA | 1..3745<br>gcacaGAAAGGGATGCCTCCTGTTGCCTGGACAGGACAGTTGGCTGGGAA<br>GGAAAGAGAAAATTGatctt 3816..5854  |
| NM_001033173 | 0.642819    | 0.038690112 | Usp31  | AGACA       | 1..3428<br>ccggaGCTTGAGTAGAGAAGGCTCCAGACAAGCTTAGGCTCTGACAGAG<br>CCAGCGTCACCTCCAacctcc 3499..10198 |
