# Supplementary material for: The landscape of N 6-methyladenosine modification patterns and altered transcript profiles in the cardiac-specific deletion of natriuretic peptide receptor A
Source: Royal Society of Chemistry journal article supplement (doi:10.1039/d2mo00201a), 2022-10-31
Supplement: d2mo00201a15.pdf [file d2mo00201a15.pdf]

Supplementary Table 6: The top 10 m6A site abundance hypermethylated single nucleotide m6A site between NPRA<sup>-/-</sup> vs NPRA<sup>+/+</sup>.

| Trans ID     | Fold change | P value     | Gene Symbol | m6A motif Sequence | Transcript Sequence                                                                               |
|--------------|-------------|-------------|-------------|--------------------|---------------------------------------------------------------------------------------------------|
| NM_027560    | 4.977784012 | 0.000299406 | Arrdc2      | GGACA              | 1..1758<br>gaactGTAGTTTGGGAGAGATGAATCTAGGAATGGACACTTCCAGTCTC<br>AAGGAACCAGAACCAGctaga 1829..2346  |
| NM_013743    | 3.274455439 | 0.000482819 | <b>Pdk4</b> | GGACA              | 1..1482<br>gagtaCAAACCTTGACCTGATGAGGGACAGAGCTTGGTTGGATGACCC<br>GGGAGAAGTCAGGGCAGggctc 1553..3453  |
| NM_008720    | 2.84411589  | 0.005139401 | Npc1        | AGACA              | 1..4002<br>gactgTGTTTATGGATAGGTCAAGTTTACTGCAAGACAGCTGCGCTGTC<br>AAGACTGAGCTGGCTTcagc 4073..5209   |
| NM_008288    | 2.781177699 | 0.00471214  | Hsd11b1     | GGACA              | 1..957<br>ttttCATTACGATATTATAATAAAGGACATGTTTTGTAAGTAACTAGGAAC<br>TCCTGAGCCCTGGTGagtgg 1028..1373  |
| NM_019773    | 2.607516031 | 0.007443007 | Rab9        | GGACA              | 1..507<br>gtgtgGAATTTTTAAATAAAGATCTGGAGGTGGACGGACATTTTGTAC<br>CATGCAGATTTGGGACacagc 578..1448     |
| NM_011584    | 2.57009831  | 0.002815113 | Nr1d2       | GAACA              | 1..1048<br>gcccaCAAGGATACCTTTCTGTATAATCAGGAACATCGAGAAAACCTCA<br>TCTGAGAGCATGCCACCTcaga 1119..4640 |
| NM_001356285 | 2.528497209 | 0.012280269 | Gpam        | GGACA              | 1..3235<br>aagtaCAACTTTTCAGGCTAGTTACTGTGATGGACATTGAGGTGTTTGT<br>AGAAGTACTCTTATAtagta 3306..6246   |
| NM_138686    | 2.517350768 | 0.006808464 | Cys1        | TGACA              | 1..1590<br>tgtcaCCTGCAAATGATTCCATGAACTCGTGACTTGACAAGAGTACCTT<br>TGAGTACTTGGCTGAGagact 1661..1838  |

|              |             |             |        |       |                                                                                                   |
|--------------|-------------|-------------|--------|-------|---------------------------------------------------------------------------------------------------|
| NM_001146275 | 2.501555126 | 0.012757477 | ligp1  | TGACA | 1..1448<br>agtttTCTTAAAGAAATATTTTACCTGAAATATTATTTTCCTTGACATGGT<br>GACTGAGGATGCTAAaactc 1519..3123 |
| NM_027560    | 2.472702826 | 0.025525207 | Arrdc2 | AGACA | 1..1806<br>caaggAACCAGAACCAGCTAGAAGTCCAGAGGGGAGACAGAAGACTT<br>CCAAAGGGCATTTCGGCTgaggc 1877..2346  |
