# Supplementary material for: The landscape of N 6-methyladenosine modification patterns and altered transcript profiles in the cardiac-specific deletion of natriuretic peptide receptor A
Source: Royal Society of Chemistry journal article supplement (doi:10.1039/d2mo00201a), 2022-10-31
Supplement: d2mo00201a16.pdf [file d2mo00201a16.pdf]

Supplementary Table 7: The top 10 m6A site abundance hypomethylated single nucleotide m6A site between NPRA<sup>-/-</sup> vs NPRA<sup>+/+</sup>.

| Trans ID     | Fold change | P value     | Gene Symbol | m6A motif Sequence | Transcript Sequence                                                                                       |
|--------------|-------------|-------------|-------------|--------------------|-----------------------------------------------------------------------------------------------------------|
| NM_001347491 | 0.665489941 | 0.006871362 | Zscan26     | AGACA              | 1..974<br>gttctGTTGCTGCTGACCATCAGGAAATCTCTAAAG <u>ACA</u> AAAGGTCATCCCTGC<br>CAAGAGTGTGGGaaagt 1045..4362 |
| NM_001355075 | 0.664545856 | 0.036500643 | Ext2        | GGACA              | 1..2565<br>actctGTGAAAATGCCAAAGGAAGGAAGCCTCAGGG <u>AC</u> AGGCTGCAACTTG<br>GAGCCCAGCGCATCactct 2636..2943 |
| NM_024452    | 0.664243345 | 0.044640765 | Luzp1       | GAACA              | 1..3177<br>atgttCAGAAGACCCCCGACTGGAATAGGTAGGA <u>ACA</u> TGGAAGCTACTAAC<br>GCCTATACGCAGAggcc 3248..7529   |
| NM_175331    | 0.663609178 | 0.033183306 | Nt5dc3      | GGACA              | 1..2023<br>gagacCTCTTGATGGCTGCCTGTGTTCCGTAGGTGGAGAGTGG <u>ACA</u> CTTCTT<br>GATTCTGTGAGACattc 2094..5952  |
| NM_133978    | 0.663125176 | 0.012930618 | Cmtm7       | AGACA              | 1..883<br>gcacaGTAGAGAGACTTGTGGATCTGCCTGCATAG <u>ACA</u> CGCCTTCTTCATA<br>CCCTCAGGACCGAgacca 954..1137    |
| NM_172739    | 0.663121888 | 0.019265021 | Arhgap35    | GGACA              | 1..4274<br>aagaaAGAGGAGGACCAGGCATCCCAAGGTTATAAAGGG <u>ACA</u> ATGCTGTC<br>ATTCCATATGAAACagatg 4345..8393  |
| NM_033320    | 0.663011245 | 0.045900854 | Glee        | TAACA              | 1..3817<br>gacgtGAGGGAGGATGCCTCTGTGTCCTGGGGGTA <u>ACA</u> AAATGAGACTCTG<br>GGTGTGCAGGAATtctgc 3888..4625  |
| NM_001364556 | 0.662351757 | 0.036141824 | C87436      | GAACA              | 1..546<br>cataaCAGACCTTGTCTCAAAAAGAAAAG <u>ACA</u> AACTGGGCTGCCAAGAGC<br>TCTACCTAGAGGAGttgga 617..3004    |

|              |             |             |       |       |                                                                                                   |
|--------------|-------------|-------------|-------|-------|---------------------------------------------------------------------------------------------------|
| NM_001168525 | 0.662341543 | 0.029579154 | Sgms1 | GAACA | 1..1090<br>caaggAGGGATAGTGTCTGCCCTGTACGAACAAGTGACTGCTGACGTCTGAG<br>AGCAAGCTGGGGGtactg 1161..4039  |
| NM_001346801 | 0.661750593 | 0.025409269 | Pprc1 | AGACA | 1..2247<br>tcagcGAAGGCAGCAACGGCAAACGGAAGCAGAGAACAAGGAATTCTCAGCC<br>CCCAGTTGTTGGCAagtgg 2318..5250 |
