# Supplementary material for: The landscape of N 6-methyladenosine modification patterns and altered transcript profiles in the cardiac-specific deletion of natriuretic peptide receptor A
Source: Royal Society of Chemistry journal article supplement (doi:10.1039/d2mo00201a), 2022-10-31
Supplement: d2mo00201a17.pdf [file d2mo00201a17.pdf]

Supplementary Table 9: The 7 methylation stoichiometry hypermethylated multi nucleotide m6A site between NPRA<sup>-/-</sup> vs NPRA<sup>+/+</sup>.

| Trans ID     | Fold change | P value     | Gene Symbol | m6A motif Sequence | Transcript Sequence                                                                                                |
|--------------|-------------|-------------|-------------|--------------------|--------------------------------------------------------------------------------------------------------------------|
| NM_001025296 | 1.966109592 | 0.031204023 | Dffa        | GGACA;AGACA        | 1..916<br>gccctGGCTGTCGCTCTGAGCTGG <u>A</u> CA TAAGGAAGGCAGAG <u>A</u> CAGTCCAGCAGG<br>CCTGCACCACgggagc 987..2467  |
| NM_001025432 | 1.724472792 | 0.015923966 | Crebbp      | GGACA;GAACA        | 1..7345<br>accatGGCCAGCTCCATGGATCAGGG <u>A</u> CACCTGGGGAACCCTGA <u>A</u> CAGAGTGCAA<br>TGCTCCCCCAgctga 7416..7507 |
| NM_025862    | 1.792592057 | 0.020649672 | Acad8       | AGACA;GAACA        | 1..1420<br>tgagcTGTCAGCCACGCTGCTGGTTCTGAG <u>A</u> CAAGA <u>A</u> CAGAGTTCTTAGCAGAGC<br>TAGAAGGGCTgctct 1491..2864 |
| NM_001290484 | 1.686158604 | 0.030192482 | Gtf3c5      | GGACA;GGACA        | 1..1888<br>aggacATGCTGGCGAGTCATGATGG <u>A</u> CAGTTGGG <u>A</u> CAGGCTTGTGCCCCATCC<br>AGGCAGTGAGatgag 1959..2823   |
| NM_001358593 | 1.511629805 | 0.039840383 | Lifr        | AAACA              | 1..3931<br>caaggGAGAAAACCTTCCCAAGTCAA <u>A</u> CAGCGTTAATTTGCCTGACATTTACTGC<br>GGTCTAGAGGagaac 4002..9876          |
| NM_001363439 | 1.525933753 | 0.002115092 | Sirt7       | GAACA              | 1..1377<br>gaagaAAGTGGCATAGCCCGGAGTTGACAAA <u>A</u> CAGATTGGCACTTTGCAGATGG<br>CTTGACCCTTgttca 1448..1870           |
| NM_010444    | 1.966580515 | 0.006814971 | Nr4a1       | GGACA;GGACA        | 1..1877<br>ttggtACCCCCTCCACCTATTGTGG <u>A</u> CAAGATCTTTATGG <u>A</u> CACATTGTCTTTCTGA<br>CCCCTGCCctgaa 1948..2476 |
