# Supplementary material for: The landscape of N 6-methyladenosine modification patterns and altered transcript profiles in the cardiac-specific deletion of natriuretic peptide receptor A
Source: Royal Society of Chemistry journal article supplement (doi:10.1039/d2mo00201a), 2022-10-31
Supplement: d2mo00201a18.pdf [file d2mo00201a18.pdf]

Supplementary Table 10: The top 10 methylation stoichiometry hypomethylated multi nucleotide m6A site between NPRA<sup>-/-</sup> vs NPRA<sup>+/+</sup>.

| Trans ID         | Fold change | P value     | Gene Symbol | m6A motif Sequence | Transcript Sequence                                                                                |
|------------------|-------------|-------------|-------------|--------------------|----------------------------------------------------------------------------------------------------|
| NM_00117<br>7412 | 0.665938403 | 0.038683178 | Usp35       | GGACA;GAACA        | 1..2028<br>gggaaGGAGAAGGAGGTGGCAGAGGACAGGGAAGAGGAAGGAACAAGGGAAGA<br>GGAGAAAGAAGAggggg 2099..3982   |
| NM_03200<br>0    | 0.663517296 | 0.038668649 | Trps1       | AGACA              | 1..3879<br>tcaatCTGCCTCCTCATTCTCAGCTGTTGGATCAGACAATGACATTCCTCTAGATT<br>TGGCGATCaagca 3950..10202   |
| NM_00108<br>1117 | 0.663268282 | 0.04725004  | Mki67       | GAACA;GAACA        | 1..3791<br>gaattCATCAGGGAGTAAGAGAAGGTCACGAACATCTAAGAACAAGGCTCAGCCC<br>CTAGAAGACCTggat 3862..10075  |
| NM_00131<br>6753 | 0.66087263  | 0.048147267 | Hmgxb4      | AGACA;AGACA;AGACA  | 1..1421<br>acacGGGAGAAGAAAAAGAAAAGGGAAGACAAGACAGAGACAGAGAGAGGG<br>GAGAAAAGCCGAaaaag 1492..4018     |
| NM_02899<br>3    | 0.658784574 | 0.017666442 | Mau2        | GAACA              | 1..2091<br>tggccTAATCTGTGTCTGGGTGTCACCTGAGAAACAAGGGTGACAATGTGTGTA<br>GGGGCATCATctgag 2162..5369    |
| NM_02953<br>2    | 0.658685801 | 0.003899557 | Snrnp35     | GGACA;GGACA        | 1..772<br>gagggAGTTCAGGGAGGAGAGGGTCAAAAGCCGGACAAGAGGGACAGAAGTA<br>AGTAGAGGCAGCagcag 843..1092      |
| NM_15289<br>5    | 0.658017255 | 0.043819971 | Kdm5b       | GGACA;GGACA        | 1..4463<br>aagaaGAAAATCAAAGTCTGAGTCACCCCAAGGACATGGACAGTTTCAAGTTAGAAA<br>GAGAGCGTAGctatg 4534..6300 |
| NM_17892<br>3    | 0.657324708 | 0.031574943 | Scaf4       | GGACA;AGACA        | 1..3799<br>tggaaGAGAGAAGTAGACGCTCTAGTGGGCATCGGGACAGAGACAGGGATTCTA                                  |

|                  |             |             |       |                   |                                                                                                                                  |
|------------------|-------------|-------------|-------|-------------------|----------------------------------------------------------------------------------------------------------------------------------|
|                  |             |             |       |                   | GAGATAGAGAGtcccg 3870..4448                                                                                                      |
| NM_03239<br>3    | 0.656491231 | 0.023330276 | Map1a | GAACA;GGACA;GAACA | 1..4863<br>catcaGAAGGACGAGGCTCTAGATGAAGAGAA <u>CA</u> AGCCTGGAGG <u>CA</u> CAGCAGGAT<br>AAGACTTCAG <u>A</u> acagaaag 4937..11823 |
| NM_00104<br>5807 | 0.653115859 | 0.035249095 | Rbm15 | GGACA;GGACA       | 1..2047<br>ggatcGAAGGAGGGATGGCTGGTCACTGG <u>CA</u> GG <u>CA</u> GAGGTGATCGGGACTT<br>GCCCAGCAGCAgggac 2118..3270                  |
