# Supplementary figures and images for: The landscape of N 6-methyladenosine modification patterns and altered transcript profiles in the cardiac-specific deletion of natriuretic peptide receptor A
Source: Royal Society of Chemistry journal article supplement (doi:10.1039/d2mo00201a), 2022-10-31

Supplementary Figure.3

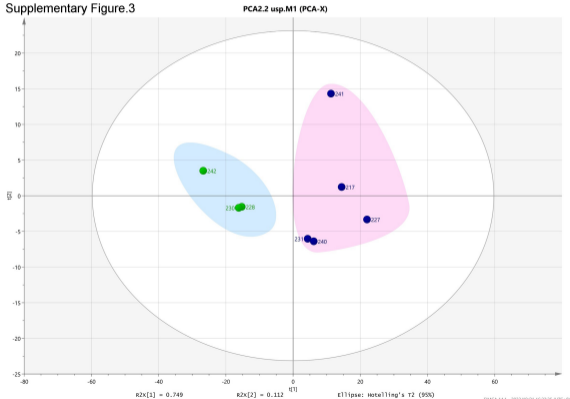

Supplement: d2mo00201a2.pdf [file d2mo00201a2.pdf]

Supplementary Figure 1

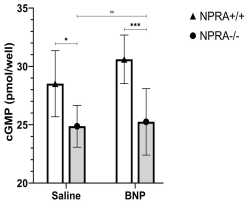

Supplement: d2mo00201a3.pdf [file d2mo00201a3.pdf]

## Supplementary Figure 2

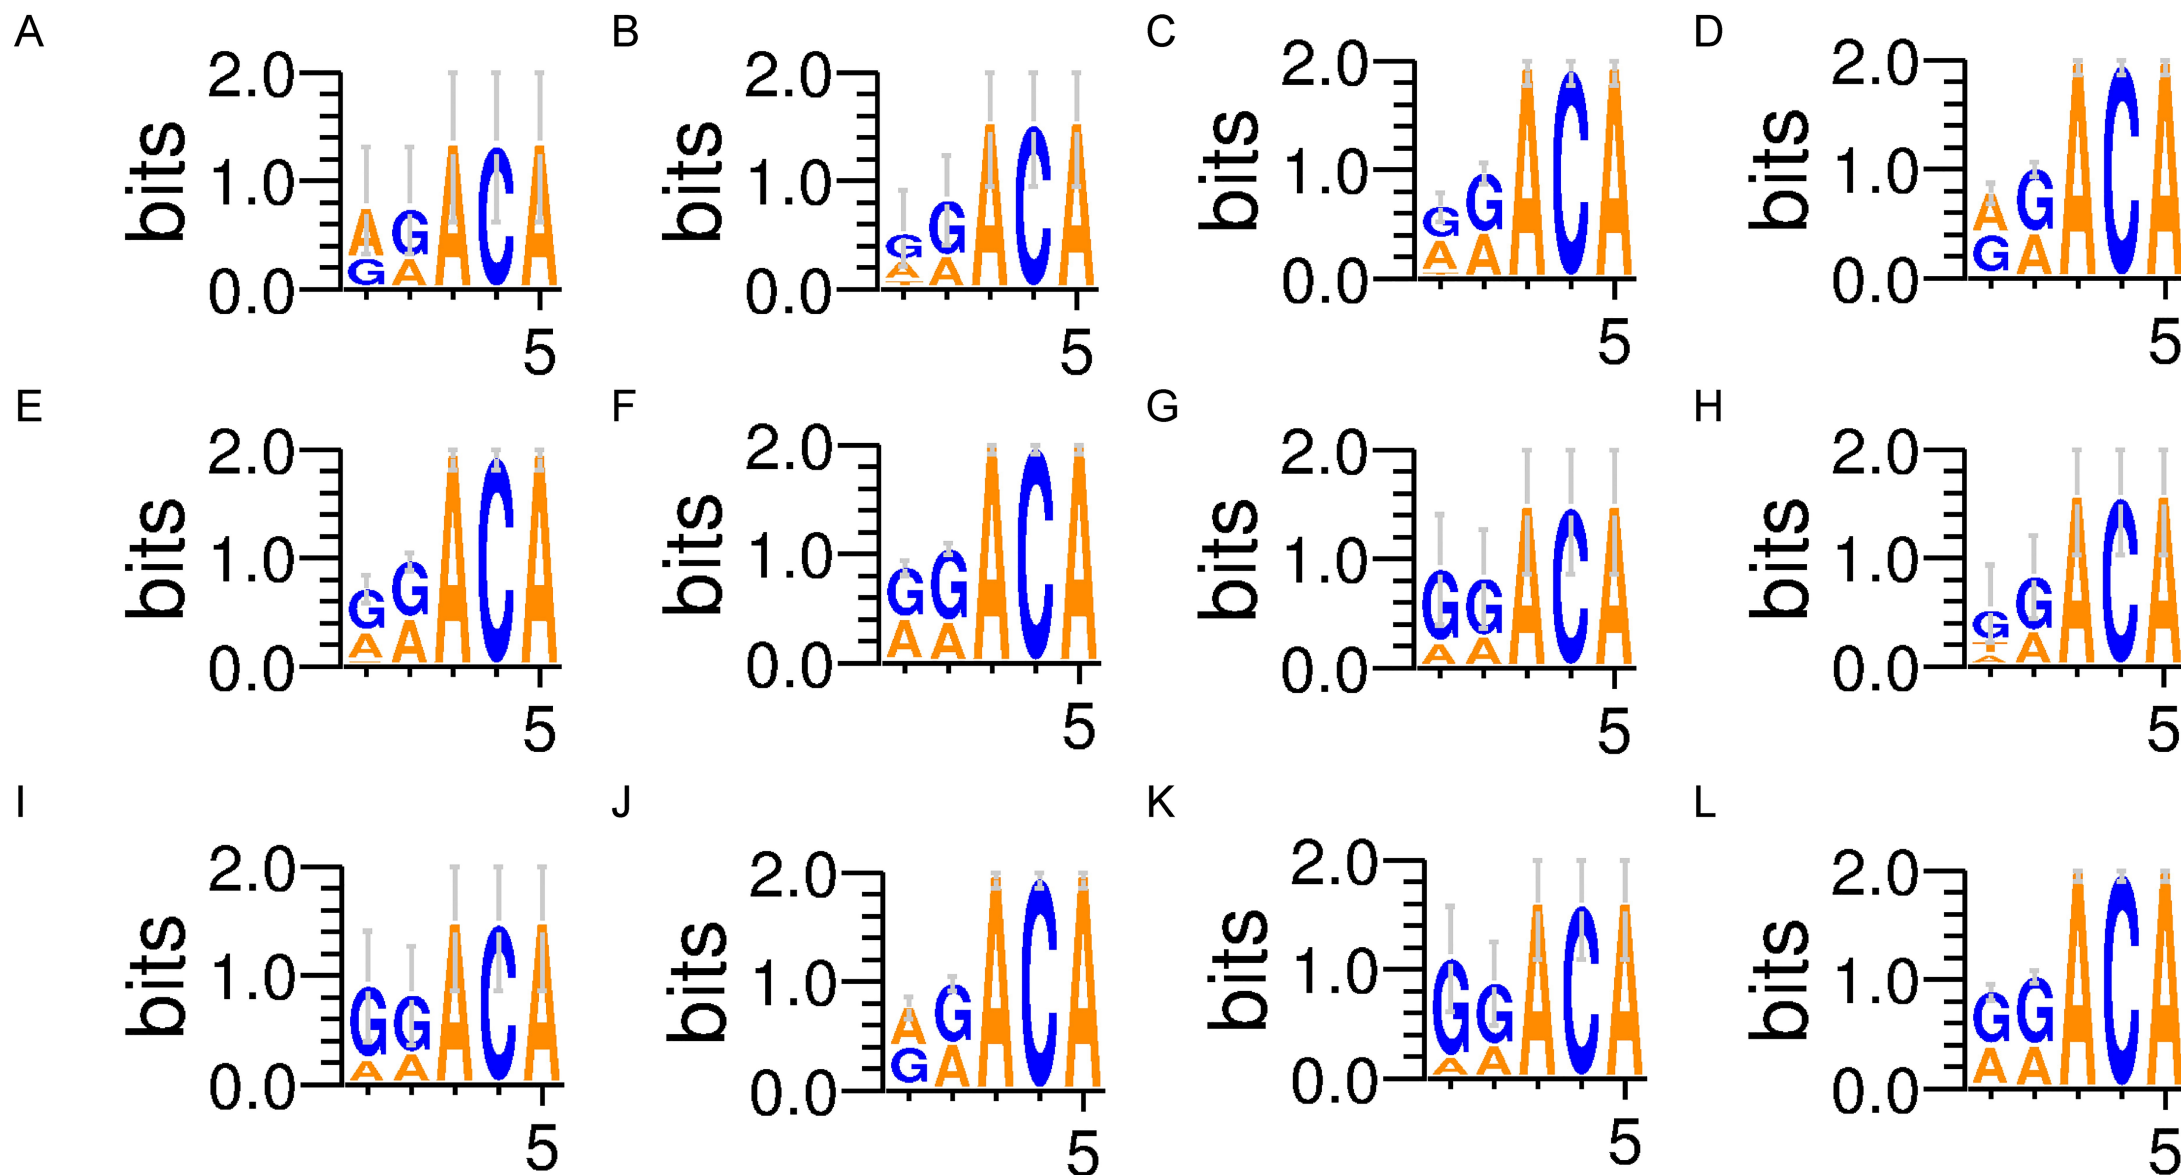

Supplement: d2mo00201a4.pdf [file d2mo00201a4.pdf]
